# Supplementary material for: Case for hospital nurse-to-patient ratio legislation in Queensland, Australia, hospitals: an observational study
Source: PubMed Central journal article supplement — BMJ Open. 2020 Sep 6;10(9):e036264. doi: 10.1136/bmjopen-2019-036264 (PMC7476482; doi:10.1136/bmjopen-2019-036264), 2020-09-06
Supplement: bmjopen-2019-036264.draft_revisions.pdf [file bmjopen-2019-036264.draft_revisions.pdf]

# BMJ Open

BMJ Open is committed to open peer review. As part of this commitment we make the peer review history of every article we publish publicly available.

When an article is published we post the peer reviewers' comments and the authors' responses online. We also post the versions of the paper that were used during peer review. These are the versions that the peer review comments apply to.

The versions of the paper that follow are the versions that were submitted during the peer review process. They are not the versions of record or the final published versions. They should not be cited or distributed as the published version of this manuscript.

BMJ Open is an open access journal and the full, final, typeset and author-corrected version of record of the manuscript is available on our site with no access controls, subscription charges or pay-per-view fees (<http://bmjopen.bmj.com>).

If you have any questions on BMJ Open's open peer review process please email [info.bmjopen@bmj.com](mailto:info.bmjopen@bmj.com)

# BMJ Open

## The Case for Hospital Nurse-to-Patient Ratio Legislation in Queensland, Australia Hospitals: An Observational Study

|                               |                                                                                                                                                                                                                                                                                                                                                                                                                                                                                                                                                                                               |
|-------------------------------|-----------------------------------------------------------------------------------------------------------------------------------------------------------------------------------------------------------------------------------------------------------------------------------------------------------------------------------------------------------------------------------------------------------------------------------------------------------------------------------------------------------------------------------------------------------------------------------------------|
| Journal:                      | <i>BMJ Open</i>                                                                                                                                                                                                                                                                                                                                                                                                                                                                                                                                                                               |
| Manuscript ID                 | bmjopen-2019-036264                                                                                                                                                                                                                                                                                                                                                                                                                                                                                                                                                                           |
| Article Type:                 | Original research                                                                                                                                                                                                                                                                                                                                                                                                                                                                                                                                                                             |
| Date Submitted by the Author: | 09-Dec-2019                                                                                                                                                                                                                                                                                                                                                                                                                                                                                                                                                                                   |
| Complete List of Authors:     | McHugh, M.D.; University of Pennsylvania School of Nursing, Philadelphia, PA, USA mchughm@nursing.upenn.edu., Center for Health Outcomes and Policy Research<br>Aiken, Linda; University of Pennsylvania, School of Nursing;<br>Windsor, Carol; Queensland University of Technology, School of Nursing<br>Douglas, Clint ; Queensland University of Technology Faculty of Health, School of Nursing<br>Dierkes, Andrew; University of Pennsylvania, School of Nursing, Center for Health Outcomes and Policy Research<br>Yates, Patsy; Queensland University of Technology, School of Nursing |
| Keywords:                     | Health policy < HEALTH SERVICES ADMINISTRATION & MANAGEMENT, Quality in health care < HEALTH SERVICES ADMINISTRATION & MANAGEMENT, International health services < HEALTH SERVICES ADMINISTRATION & MANAGEMENT                                                                                                                                                                                                                                                                                                                                                                                |
|                               |                                                                                                                                                                                                                                                                                                                                                                                                                                                                                                                                                                                               |

SCHOLARONE™  
Manuscripts

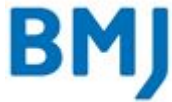

I, the Submitting Author has the right to grant and does grant on behalf of all authors of the Work (as defined in the below author licence), an exclusive licence and/or a non-exclusive licence for contributions from authors who are: i) UK Crown employees; ii) where BMJ has agreed a CC-BY licence shall apply, and/or iii) in accordance with the terms applicable for US Federal Government officers or employees acting as part of their official duties; on a worldwide, perpetual, irrevocable, royalty-free basis to BMJ Publishing Group Ltd ("BMJ") its licensees and where the relevant Journal is co-owned by BMJ to the co-owners of the Journal, to publish the Work in this journal and any other BMJ products and to exploit all rights, as set out in our [licence](#).

The Submitting Author accepts and understands that any supply made under these terms is made by BMJ to the Submitting Author unless you are acting as an employee on behalf of your employer or a postgraduate student of an affiliated institution which is paying any applicable article publishing charge ("APC") for Open Access articles. Where the Submitting Author wishes to make the Work available on an Open Access basis (and intends to pay the relevant APC), the terms of reuse of such Open Access shall be governed by a Creative Commons licence – details of these licences and which [Creative Commons](#) licence will apply to this Work are set out in our licence referred to above.

Other than as permitted in any relevant BMJ Author's Self Archiving Policies, I confirm this Work has not been accepted for publication elsewhere, is not being considered for publication elsewhere and does not duplicate material already published. I confirm all authors consent to publication of this Work and authorise the granting of this licence.

1  
2  
3 **The Case for Hospital Nurse-to-Patient Ratio Legislation in Queensland, Australia**  
4 **Hospitals: An Observational Study**  
5

6 Matthew D. McHugh

7 Independence Chair for Nursing Education, Professor of Nursing

8 University of Pennsylvania School of Nursing, Center for Health Outcomes and Policy  
9 Research

10 418 Curie Blvd.

11 Philadelphia, PA, USA 19104

12 +1215-746-0205

13 mchughm@nursing.upenn.edu  
14  
15

16 Linda H. Aiken

17 The Claire M. Fagin Leadership Professor of Nursing

18 Professor of Sociology

19 University of Pennsylvania School of Nursing, Center for Health Outcomes and Policy  
20 Research

21 Philadelphia, PA, USA  
22

23 Carol Windsor

24 Associate Professor

25 Queensland University of Technology School of Nursing

26 Brisbane, QLD, Australia  
27  
28

29 Clint Douglas

30 Professor and Nursing Chair

31 Queensland University of Technology School of Nursing

32 Metro North Hospital and Health Service

33 Brisbane, QLD, Australia  
34

35 Andrew Dierkes

36 Post-doctoral fellow

37 University of Pennsylvania School of Nursing, Center for Health Outcomes and Policy  
38 Research

39 Philadelphia, PA, USA  
40

41 Patsy Yates

42 Distinguished Professor

43 Queensland University of Technology School of Nursing

44 Brisbane, QLD, Australia  
45

46 Word count: 2483  
47  
48  
49  
50  
51  
52  
53  
54  
55  
56  
57  
58  
59  
60

## Abstract

**Objectives.** To determine whether there was variation in nurse staffing across hospitals in Queensland prior to implementation of nurse-to-patient ratio legislation targeting medical-surgical wards, and if so, the extent to which nurse staffing variation was associated with poor outcomes for patients and nurses.

**Design.** Analysis of cross-sectional data derived from nurse surveys linked with admitted patient outcomes data.

**Setting.** Public hospitals in Queensland.

**Participants.** 4,372 medical-surgical nurses and 146,456 patients in 68 public hospitals.

**Main Outcome Measures.** 30-day mortality, quality and safety indicators, nurse outcomes including burnout and job dissatisfaction.

**Results.** Medical-surgical nurse-to-patient ratios before implementation of ratio legislation varied significantly across hospitals (mean 5.52 patients per nurse; SD = 2.03). After accounting for patient characteristics and hospital size, each additional patient per nurse was associated with 12% higher odds of 30-day mortality (OR=1.12; 95% CI 1.01–1.26). Each additional patient per nurse was associated with poorer outcomes for nurses including 15% higher odds of burnout (OR = 1.15; 95% CI 1.07–1.23) and 14% higher odds of job dissatisfaction (OR = 1.14; 95% CI 1.02–1.28), as well as higher odds of concerns about quality of care (OR = 1.12; 95% CI 1.01–1.25) and patient safety (OR = 1.32; 95% CI 1.11–1.57).

**Conclusions.** Before ratios were implemented, nurse staffing varied considerably across Queensland hospital medical-surgical wards and higher nurse workloads were associated with patient mortality, low quality of care, nurse burnout, and job dissatisfaction. The considerable variation across hospitals and the link with outcomes suggests that taking action to improve staffing levels was prudent.

## Article Summary

### Strengths and limitations of this study:

- Similar study design and measures as other published international studies examining the relationship between nurse staffing and outcomes.
- Study done just before implementation of ratios policy to quantify the scope of the variation in staffing and relationship with outcomes in the state.
- Measure of staffing derived directly from staff nurses.
- Indicators of quality, safety, job dissatisfaction, and burnout from nurses as well as risk-adjusted patient outcome data on mortality.
- A limitation of cross-sectional data is that we cannot confirm that observed associations are causal, although studies using longitudinal data suggests that cross-sectional results closely approximate longitudinal panel results.

## The Case for Hospital Nurse-to-Patient Ratio Legislation in Queensland, Australia Hospitals: An Observational Study

Nurses provide round-the-clock care at the hospital bedside and act as a surveillance safety net for acutely ill patients. Having enough nurses with a manageable workload is important to ensure that nurses can effectively and consistently manage patient care needs, coordinate care, preempt clinical deterioration, prevent harm, and provide education for patients and families. There is strong evidence over decades internationally showing that patients cared for in hospitals with more patients per nurse have worse outcomes including mortality, adverse events, infections, and readmissions, compared with similar patients in hospitals with fewer patients per nurse.<sup>1-9</sup>

A policy intervention often discussed, but rarely implemented is establishing minimum nurse-to-patient ratios. Very few places around the world that have taken up such policies—California in the US, the state of Victoria in Australia, Wales, and Ireland are examples. The state of Queensland, Australia, joined this short list when, on 1 July 2016, Queensland Health established minimum nurse-to-patient ratios for acute adult medical-surgical wards in 27 prescribed public hospitals across the state. The legislation requires that the average nurse-to-patient ratio on morning/afternoon shifts must be no less than 1:4 and on night shifts no less than 1:7.

The purpose of this analysis was to determine the extent to which nurse-to-patient ratios varied across Queensland Health hospitals before the ratios legislation, and to evaluate the relationship between nurse-to-patient ratios and outcomes including patient mortality, quality and safety indicators, and nurse job outcomes including burnout and job dissatisfaction. The results will help determine if there was an empirical basis for the legislation, and will establish a baseline level of nurse staffing and patient outcomes against which to compare the impact of the legislation in the future.

### Methods

We conducted a cross-sectional analysis of data from surveys of Queensland hospital nurses and patient outcomes data. We linked individual surgical patient outcomes data with the aggregated nurse survey data describing medical-surgical nurse-to-patient ratios using a common hospital identifier. We described nurse staffing levels across hospitals and evaluated whether staffing levels were associated with outcomes. The approach is based on previous research using these same methods to study the relationship between nurse-to-patient ratios and outcomes in other countries.<sup>3,10</sup> Ethics approval was obtained from the Queensland University of Technology and the University of Pennsylvania.

#### Study Population and Data Sources

##### *Nurse Survey*

We surveyed nurses to collect detailed information about their hospitals that is not available from any other source. We take advantage of nurses as informants of the organizational context in which care takes place because they are positioned at the bedside providing care, they are present 24 hours a day, and they communicate and work directly with doctors, other providers, patients and families, and hospital managers. This method of measuring organizational features of hospitals is more accurate than reports by a single “key informant” within a hospital and is supported by the organizational research literature.<sup>11</sup> We used the nurse survey data to create measures of acute adult medical-surgical nurse-to-patient

ratios, quality of care and patient safety indicators, as well as individual nurse job outcomes (i.e., burnout and job dissatisfaction).

The baseline nurse survey data were collected between May and June 2016 before implementation of ratios in July 2016. We used a modified Dillman<sup>12</sup> approach for email survey campaigns. We sent emails and reminders to 28,708 licensed nurses (all those with an available email address which accounted for 90% of all nurses) and received responses from 8,412 nurses, including 4,372 medical-surgical nurses, giving an overall response rate of 29%. Our primary concern regarding representativeness, however, is at the hospital level; our sample of 68 public hospitals includes all Queensland public hospitals with  $\geq 50$  beds and over half with  $< 50$  beds. The average hospital was represented by 64 respondents; thus, the preponderance of Queensland public hospitals and all prescribed for ratios are represented. We provided respondents with a list of hospitals to identify their hospital, allowing us to aggregate responses and attribute medical-surgical nurse staffing information to their hospital and link with patient outcomes data.

#### *Patient Data*

To examine the relationship between adult acute medical-surgical nurse staffing and patient outcomes, we used state-based clinical patient discharge data (the Queensland Hospital Admitted Patient Data) specific to general surgery, orthopedic, and vascular surgery patients. These conditions were selected because they account for a substantial share of hospital admissions, most hospitals care for these patients, and there are well established risk-adjustment methods.<sup>13,14</sup> This population is also consistent with other large studies evaluating the relationship between nurse staffing levels and patient outcomes internationally, which allows us to ascertain whether any evidence for this relationship in Queensland is similar or different from what has been observed outside of Australia.<sup>2,3,9</sup> The clinical information on patient outcomes was derived from the Queensland Hospital Admitted Patient Data, a database representing information on all inpatients in Queensland hospitals. These data were used to create the patient outcome indicator of 30-day mortality; these files also provide information on patient demographics, diagnoses and procedures (ICD10-AM coding), comorbidities, and discharge status. The files were linked with vital statistic death records allowing us to measure the outcome of 30-day mortality. There were no missing data in the population under investigation on variables of interest for this study.

#### *Patient and public involvement*

This study utilized secondary patient data from a deidentified pre-existing data set—the Queensland Hospital Admitted Patient Data. The survey of nurses was based on an established survey used in international research so that findings could be placed in the context of the broader international literature on the relationship between nurse staffing and outcomes. Thus, patients and nurses were not directly involved in the development of the research questions, variable measures, or study design.

#### Measures

##### *Nurse-to-patient ratios*

*Nurse-to-patient ratios.* Our primary measure of interest was the average nurse-to-patient ratios on non-ICU adult acute medical-surgical units (hereafter referred to as nurse-to-patient ratios). To be consistent with the legislation, “nurse” refers to both registered and enrolled nurses. By asking survey questions about how many nurses and how many patients were on the ward during the last shift, we obtain a nurse-to-patient ratio measure reflecting



the ward average nurse-to-patient ratio. This is consistent with the ratios legislation, which allows individual nurses to have a greater (or lesser) number of patients than the prescribed ratio so long as the ward average does not fall short during the shift. We express the ratio as the number of patients per nurse, which allows us to interpret our model results in terms of the effect of each additional patient per nurse on each outcome.

### *Outcomes*

*Mortality.* We used the Queensland Hospital Admitted Patient Data to evaluate the outcome of 30-day mortality. In our mortality models, we included indicators from the Charlson comorbidity index to account for comorbidities.<sup>15-19</sup> We also included variables indicating sex and age along with dummy variables for 78 surgical procedure types.

*Quality of care and patient safety.* Our survey allowed us to collect information reflecting nurses' assessments of a number of quality and safety indicators in their wards. Measures included the overall quality of care, the culture of safety, confidence that discharged patients are ready to care for themselves, confidence that management will resolve patient care concerns raised by nurses, and whether nurses would recommend the hospital to family and friends in need of care.<sup>20</sup> Evidence shows that nurse-reported quality indicators correspond closely with objective patient outcomes measures like mortality.<sup>21,22</sup>

*Nurse outcomes.* As in prior work,<sup>2,10,23</sup> burnout was measured using the Emotional Exhaustion subscale of the Maslach Burnout Inventory.<sup>24,25</sup> Nurses were classified as "burned out" if their score was higher than the published average for health care workers ( $\geq 27$ ). Job dissatisfaction was measured using nurses' responses to the question, "How satisfied are you with your current job?" The four-point Likert-type scale response options range from very satisfied to very dissatisfied. We dichotomized the measure such that nurses who reported being either very dissatisfied or a little dissatisfied were described as "dissatisfied" and nurses reporting being moderately satisfied or very satisfied were described as "satisfied."<sup>23</sup>

### Statistical Analysis

We first described nurse-to-patient ratios across Queensland Health hospitals. We then examined the relationship between nurse-to-patient ratios and patient mortality among general, orthopedic, or vascular surgery patients. We employed a series of robust logistic regression models, accounting for clustering of patients within hospitals. We began with the unadjusted bivariate relationship between nurse staffing and mortality. Then we estimated adjusted models that included covariates to account for the various patient characteristics (e.g., age, sex, comorbidities, surgical procedure) and hospital size. To evaluate the relationship between nurse-to-patient ratios and nurse job outcomes and the nurse-reported quality and safety indicators, we used robust logistic regression models, which take account of the clustering of nurses within hospitals, to estimate the odds of nurses reporting each outcome relative to an additional patient per nurse. We estimated these models before and after adjusting for hospital size and for nurse characteristics including age, sex, and years of experience.

### **Results**

**Table 1** shows the characteristics of the 68 public Queensland Health hospitals with both patient data and nurse-to-patient ratio data. The average medical-surgical staffing ratios across all shifts was 5.52 patients per nurse (SD=2.03). For morning and afternoon shifts, the average was 5.07 (SD=1.85) patients per nurse, while for night shifts the average was 7.4 (SD=2.3) patients per nurse.

**Table 2** shows the characteristics of our surgical patient population. Our analysis included 146,456 general, orthopedic, and vascular surgery patients. The average mortality rate was relatively low overall (1.13%) and is consistent with findings in Europe and the US.<sup>2,5</sup> **Table 3** shows that the variation in nurse-to-patient ratios on medical-surgical wards had consequences for patients. After accounting for patient characteristics and hospital size, each additional patient per medical-surgical nurse was associated with 12% higher odds of death (OR=1.12; 95% CI 1.01–1.26). These results are multiplicative such that an additional two patients per nurse would be associated with 25% higher odds of death (OR = 1.12<sup>2</sup> or 1.25).

**Figure 1** shows how the percentage of nurses reporting quality, safety, and job outcomes varied in hospitals with different morning/afternoon staffing levels in terms of patients per nurse ( $\leq 4$ ;  $4 \leq 5$ ;  $5 \leq 6$ ;  $> 6$ ). In all cases, a smaller proportion of nurses reported negative outcomes in hospitals with an average of  $\leq 4$  patients per nurse. For example, only about 5% of nurses in hospitals with  $\leq 4$  patients per nurse reported that quality of care is only fair or poor on their unit, while 15% of nurses in hospitals with an average of  $5 \leq 6$  patients per nurse rated their hospital poorly. Twenty four percent of nurses in hospitals with the best staffing levels met the criteria for burnout, while 43% of nurses in hospitals with  $> 6$  patients per nurse were burned out.

**Table 4** shows that in all but one instance (*confidence patients can manage care after discharge*), higher workloads were consistently associated with worse quality and safety. After accounting for individual nurse characteristics and hospital size, each additional patient per nurse was associated with 30% higher odds of a nurse not recommending the hospital to family or friends (OR = 1.30; 95% CI 1.14–1.49), 32% higher odds of rating patient safety at their hospital as less than excellent (OR = 1.32; 95% CI 1.11–1.57), and 12% higher odds of rating quality as less than excellent (OR = 1.12; 95% CI 1.01–1.25). Each additional patient per nurse was associated with 15% higher odds of burnout (OR = 1.15; 95% CI 1.07–1.23) and 14% higher odds of job dissatisfaction (OR = 1.14; 95% CI 1.02–1.28). These coefficients are also multiplicative; for example, an additional two patients per nurse would be associated with 69% higher odds of not recommending the hospital to family or friends (OR = 1.30<sup>2</sup> or 1.69).

## Discussion

Nurse-to-patient ratios varied considerably across Queensland Health hospitals and higher nurse workloads were linked with patient mortality, worse quality of care and patient safety, and nurse burnout and job dissatisfaction. The finding that each additional patient per nurse was associated with increased odds of mortality is consistent with results from studies in the United States and Europe based on a similar protocol.<sup>2,3</sup>

Nurse-to-patient ratios are not just important for patients; poor ratios can negatively affect nurses in terms of burnout and job dissatisfaction, which are associated with costly turnover.<sup>26,27</sup> The National Academy of Medicine's newest landmark report, *Taking Action Against Clinician Burnout: A Systems Approach to Professional Well-Being*,<sup>28</sup> highlights the central role that system factors like inadequate staffing play in the growing burnout levels among clinicians. Our findings in Queensland are consistent with those reported in the US and Europe regarding the link between staffing and job dissatisfaction, burnout, and concerns about quality and safety.<sup>2,10,20</sup> Studies have shown that hospitals that improved in terms of nurse staffing significantly lowered rates of burnout among their nurses.<sup>29</sup> These outcomes are also important indicators of hospital performance because of their relationship to patient

1  
2  
3 outcomes; for example, research has shown that hospitals with many dissatisfied nurses also  
4 had higher proportions of dissatisfied patients.<sup>23,30</sup>  
5

6 Nurse staffing is necessary but not sufficient to ensure good outcomes. Research  
7 suggests that hospitals with good work environments—where nurses have autonomy,  
8 opportunities for advancement, support and trust of management, excellent relationships built  
9 on professional respect with physician colleagues, and active engagement in organizational  
10 decision-making—have better outcomes for nurses and patients.<sup>1,20,29,31,32</sup> The benefits of  
11 better nurse staffing are conditional on having a good work environment; thus, investing in  
12 more staff without considering the environment in which those staff work may fall short of  
13 expected improvements.<sup>1</sup> Creating good work environments are directly within the control of  
14 management, and although they have much less associated cost than investments in more  
15 staff, they require purposeful effort. One example of an intervention aimed at improving the  
16 work environment along these domains is the Magnet hospital recognition program. Studies  
17 show that outcomes for nurses and patients are better in Magnet hospitals, and hospitals that  
18 have pursued Magnet recognition have seen improvements beyond those seen in hospitals that  
19 have not gone through this transformation.<sup>33,34</sup> There is only one Magnet hospital in  
20 Queensland.  
21  
22  
23

24 A potential limitation of our study is that our data are cross-sectional. This is often  
25 suggested to imply a reduced ability to establish a conclusive causal relationship between  
26 nurse staffing levels and nurse and patient outcomes. However, we note that in studies that  
27 have simultaneously considered longitudinal associations with cross-sectional associations  
28 suggest that the cross-sectional findings are reasonably close to what would be observed if we  
29 were able to examine how changes in staffing over time align with changes in outcomes.<sup>20</sup>  
30  
31

### 32 **Conclusion.**

33 In 2018, the International Council of Nurses released their position statement on safe  
34 staffing.<sup>35</sup> The statement highlights the large body of international literature suggesting a  
35 consistent relationship between nurse staffing and good outcomes. Our findings in  
36 Queensland are consistent with this evidence-base and suggest that taking action to improve  
37 staffing was a reasonable policy approach that could lead to improved patient safety and  
38 quality.  
39  
40  
41  
42  
43  
44  
45  
46  
47  
48  
49  
50  
51  
52  
53  
54  
55  
56  
57  
58  
59  
60

**Table 1** Hospital characteristics (N=68)

|                                                           | N    | %      |
|-----------------------------------------------------------|------|--------|
| <b>Beds</b>                                               |      |        |
| <50                                                       | 39   | 57%    |
| 50-99                                                     | 8    | 12%    |
| 100-199                                                   | 5    | 7%     |
| 200-500                                                   | 11   | 16%    |
| >500                                                      | 5    | 7%     |
| <b>Medical-surgical patients per nurse</b>                |      |        |
| 4 or fewer patients per nurse                             | 13   | 19%    |
| 4≤5 patients per nurse                                    | 26   | 38%    |
| 5≤6 patients per nurse                                    | 17   | 25%    |
| >6 patients per nurse                                     | 12   | 18%    |
| <b>Mean medical-surgical patients per nurse, by shift</b> |      |        |
|                                                           | Mean | (SD)   |
| All shifts                                                | 5.52 | (2.03) |
| Morning/afternoon shifts                                  | 5.07 | (1.85) |
| Night shifts                                              | 7.38 | (2.30) |

**Table 2** Characteristics of surgical patients (n=146,456)

| Characteristic         | N      | %     |
|------------------------|--------|-------|
| Age (years), mean (SD) | 62.8   | 17.9  |
| Male                   | 71,616 | 48.9% |
| Surgical category      |        |       |
| General surgery        | 44,229 | 30.2% |
| Orthopedic surgery     | 49,062 | 33.5% |
| Vascular surgery       | 52,165 | 36.3% |
| 30-day mortality       | 1,654  | 1.13% |

**Table 3** Unadjusted and adjusted odds-ratios (OR) for relationship between number of medical-surgical patients per nurse and 30-day mortality

|                  | Unadjusted |       |               | Adjusted |       |               |
|------------------|------------|-------|---------------|----------|-------|---------------|
|                  | OR         | P     | (95% C.I.)    | OR       | P     | (95% C.I.)    |
| 30-day mortality | 0.90       | 0.186 | (0.78 – 1.05) | 1.12     | 0.048 | (1.01 – 1.26) |

Notes: Logistic regression models adjusting for patient characteristics including age, sex, 17 comorbidities [myocardial infarction, congestive heart failure; peripheral vascular; cerebrovascular disease; dementia; chronic obstructive pulmonary; rheumatoid disease; peptic ulcer; mild liver disease; diabetes; diabetes with complications; hemiplegia or paraplegia; renal disease; cancer; moderate/severe liver disease; metastatic cancer; AIDS], 78 specific surgical procedures, as well as hospital size.

**Table 4** Unadjusted and adjusted odds-ratios (OR) indicating the relationship between nurse staffing and quality of care and safety indicators

|                                                             | Unadjusted |          |             | Adjusted |          |             |
|-------------------------------------------------------------|------------|----------|-------------|----------|----------|-------------|
|                                                             | OR         | <i>p</i> | (95% C.I.)  | OR       | <i>p</i> | (95% C.I.)  |
| <b>Quality and Safety Outcomes</b>                          |            |          |             |          |          |             |
| Quality less than excellent                                 | 1.12       | 0.049    | (1.00–1.25) | 1.12     | 0.037    | (1.01–1.25) |
| Quality fair or poor                                        | 1.18       | 0.004    | (1.05–1.31) | 1.17     | 0.003    | (1.05–1.31) |
| Rate patient safety as less than excellent                  | 1.33       | 0.002    | (0.99–1.52) | 1.32     | 0.002    | (1.11–1.57) |
| Not confident patients can manage care after discharge      | 1.09       | 0.091    | (0.99–1.21) | 1.06     | 0.247    | (0.96–1.16) |
| Not confident management will resolve patient care problems | 1.18       | 0.034    | (1.01–1.37) | 1.16     | 0.041    | (1.01–1.35) |
| Would not recommend hospital to family or friends           | 1.29       | <0.000   | (1.12–1.49) | 1.30     | <0.000   | (1.14–1.49) |
| <b>Job Outcomes</b>                                         |            |          |             |          |          |             |
| Dissatisfied with job                                       | 1.17       | 0.006    | (1.05–1.31) | 1.14     | 0.018    | (1.02–1.28) |
| Dissatisfied with workload                                  | 1.37       | <0.000   | (1.22–1.53) | 1.36     | <0.000   | (1.20–1.53) |
| Burnout                                                     | 1.14       | <0.000   | (1.07–1.23) | 1.15     | <0.000   | (1.07–1.23) |

Notes: Logistic regression models adjusting for nurse characteristics (age, sex, years of experience) as well as hospital size.

### **Contributorship statement**

All authors meet the criteria recommended by the International Committee of Medical Journal Editors (ICMJE). MDM, LHA, CW, CD, AD, and PY contributed to the original idea and design of the study. MDM, LHA, CW, CD, and PY contributed to the collection of data. MDM and AD conducted the data analysis. All authors contributed to the interpretation of the data and preparation of the submitted manuscript. All authors approved the submitted manuscript.

### **Competing interests**

None declared

### **Funding**

This investigation was supported by Queensland Health (project NM006239/RP731123). The funders had no role in the study design, data collection and analysis, decision to publish or preparation of the manuscript. The researchers are solely responsible for the findings and their interpretation and do not necessarily represent the views or conclusions of Queensland Health.

### **Data sharing statement**

The nurse survey data are not available. The patient data are from the Queensland Admitted Patient Data Collection and approval for their use can be requested directly from Queensland Health.



## References

1. Aiken LH, Cimiotti JP, Sloane DM, Smith HL, Flynn L, Neff DF. Effects of nurse staffing and nurse education on patient deaths in hospitals with different nurse work environments. *Medical Care*. 2011;49(12):1047-1053.
2. Aiken LH, Clarke SP, Sloane DM, Sochalski J, Silber JH. Hospital nurse staffing and patient mortality, nurse burnout, and job dissatisfaction. *JAMA*. 2002;288(16):1987-1993.
3. Aiken LH, Sloane DM, Bruyneel L, et al. Nurse staffing and education and hospital mortality in nine European countries: a retrospective observational study. *The Lancet*. 2014;383(9931):1824-1830.
4. Aiken LH, Sloane DM, Cimiotti JP, et al. Implications of the California nurse staffing mandate for other states. *Health Services Research*. 2010;45(4):904-921.
5. Duffield C, Diers D, O'Brien-Pallas L, et al. Nursing staffing, nursing workload, the work environment and patient outcomes. *Applied Nursing Research*. 2010;24(4):244-255.
6. Lasater KB, McHugh MD. Nurse staffing and the work environment linked to readmissions among older adults following elective total hip and knee replacement. *International Journal for Quality in Health Care*. 2016;28(2):253-258.
7. Ma C, McHugh MD, Aiken LH. Organization of hospital nursing and 30-day readmissions in Medicare patients undergoing surgery. *Medical Care*. 2015; 53(1):65-70.
8. Needleman J, Buerhaus P, Pankratz VS, Leibson CL, Stevens SR, Harris M. Nurse staffing and inpatient hospital mortality. *New England Journal of Medicine*. 2011;364(11):1037-1045.
9. Silber JH, Rosenbaum P. R., McHugh MD, et al. Comparison of the value of nursing work environments in hospitals across different levels of patient risk. *JAMA Surgery*. 2016;151(6):527-536.
10. Aiken LH, Sermeus W, Vanden Heede K, et al. Patient safety, satisfaction, and quality of hospital care: cross-sectional surveys of nurses and patients in 12 countries in Europe and the United States. *British Medical Journal*. 2012;344:e1717.
11. Aiken M, Hage J. Organizational interdependence and intra-organizational structure. *American Sociological Review*. 1968;33(6):912-930.
12. Dillman DA, Smyth JD, Christian LM. *Internet, Phone, Mail, and Mixed-Mode Surveys: The Tailored Design Method*. Hoboken, New Jersey: John Wiley & Sons; 2014.
13. Patel MS, Volpp KG, Small DS, et al. Association of the 2011 ACGME resident duty hour reforms with mortality and readmissions among hospitalized Medicare patients. *JAMA*. 2014;312(22):2364-2373.
14. Volpp KG, Rosen AK, Rosenbaum PR, et al. Mortality among hospitalized Medicare beneficiaries in the first 2 years following ACGME resident duty hour reform. *JAMA*. 2007;298(9):975-983.

15. Charlson M, Szatrowski TP, Peterson J, Gold J. Validation of a combined comorbidity index. *Journal of Clinical Epidemiology*. 1994;47(11):1245-1251.
16. Li B, Evans D, Faris P, Dean S, Quan H. Risk adjustment performance of Charlson and Elixhauser comorbidities in ICD-9 and ICD-10 administrative databases. *BMC Health Services Research*. 2008;8:12-19.
17. Quan H, Li B, Couris CM, et al. Updating and validating the Charlson comorbidity index and score for risk adjustment in hospital discharge abstracts using data from 6 countries. *American Journal of Epidemiology*. 2011;173(6):676-682.
18. Quan H, Sundararajan V, Halfon P, et al. Coding algorithms for defining comorbidities in ICD-9-CM and ICD-10 administrative data. *Medical Care*. 2005;43(11):1130-1139.
19. Sundararajan V, Henderson T, Perry C, Muggivan A, Quan H, Ghali WA. New ICD-10 version of the Charlson comorbidity index predicted in-hospital mortality. *Journal of Clinical Epidemiology*. 2004;57(12):1288-1294.
20. Sloane DM, Smith HL, McHugh MD, Aiken LH. Effect of changes in hospital nursing resources on improvements in patient safety and quality of care: A panel study. *Medical Care*. 2018;56(12):1001-1008.
21. McHugh MD, Stimpfel AW. Nurse reported quality of care: A measure of hospital quality. *Research in Nursing and Health*. 2012;35(6):566-575.
22. Smeds Alenius L, Tishelman C, Lindqvist R, Runesdotter S, McHugh MD. RN assessments of excellent quality of care and patient safety are associated with significantly lower odds of 30-day inpatient mortality: a national cross-sectional study of acute-care hospitals. *International Journal of Nursing Studies*. 2016;61:117-124.
23. McHugh MD, Kutney-Lee A, Cimiotti JP, Sloane DM, Aiken LH. Nurses' widespread job dissatisfaction, burnout and frustration with health benefits signal problems for patient care. *Health Affairs*. 2011;30(2):202-210.
24. Maslach C, & Jackson, S.E. *Maslach Burnout Inventory Manual*. 2nd ed. Palo Alto, CA: Consulting Psychologists Press.; 1986.
25. Maslach C, Jackson SE. Burnout in health professions: a social psychologists analysis. In: Saunders G, Suls J, eds. *Social Psychology of Health and Illness*. Hillsdale, NJ: Lawrence Erlbaum Association; 1982:227-251.
26. Gilmartin MJ. Thirty years of nursing turnover research: looking back to move forward. *Medical Care Research and Review*. 2013;70(1):3-28.
27. Hayes LJ, O'Brien-Pallas L, Duffield C, et al. Nurse turnover: a literature review - an update. *International Journal of Nursing Studies*. 2012;49(7):887-905.
28. National Academies of Sciences Engineering and Medicine. *Taking Action Against Clinician Burnout: A Systems Approach to Professional Well-Being*. Washington, DC: The National Academies Press;2019.

- 1  
2  
3 29. Kutney-Lee A, Wu ES, Sloane DM, Aiken LH. Changes in hospital nurse work environments and  
4 nurse job outcomes: An analysis of panel data. *International Journal of Nursing Studies*.  
5 2013;50(2):195-201.  
6  
7 30. Vahey DC, Aiken LH, Sloane DM, Clarke SP, Vargas D. Nurse burnout and patient satisfaction.  
8 *Medical Care*. 2004;42(2 Suppl):II57-66.  
9  
10 31. Aiken LH, Sloane DM, Barnes H, Cimiotti J, Jarrin O, McHugh MD. Nurses' and patients'  
11 appraisals show patient safety in hospitals is still deficient and recommended measures not  
12 implemented. *Health Affairs*. 2018;37(11):1744-1751.  
13  
14 32. McHugh MD, Aiken LH, Eckenhoff M, Burns LR. Achieving Kaiser Permanente quality. *Health*  
15 *Care Management Review*. 2016;41(3):178-188.  
16  
17 33. Kutney-Lee A, Quinn L, Witkoski Stimpfel A, Sloane DM, Cimiotti J, Aiken LH. Changes in  
18 patient and nurse outcomes associated with Magnet hospital recognition. *Medical Care*.  
19 2015;53(6):550-557.  
20  
21 34. McHugh MD, Kelly LA, Smith HL, Wu ES, Vanak J, Aiken LH. Lower mortality in Magnet  
22 hospitals. *Medical Care*. 2013;51(5):382-388.  
23  
24  
25 35. Aiken LH. Evidence-based nurse staffing: ICN's new position statement. *International Nursing*  
26 *Review*. 2018;65(4):469-471.  
27  
28  
29  
30  
31  
32  
33  
34  
35  
36  
37  
38  
39  
40  
41  
42  
43  
44  
45  
46  
47  
48  
49  
50  
51  
52  
53  
54  
55  
56  
57  
58  
59  
60

**Figure 1.** Percentage of nurses reporting quality, safety, and job outcomes across hospitals with varying average number of patients per nurse

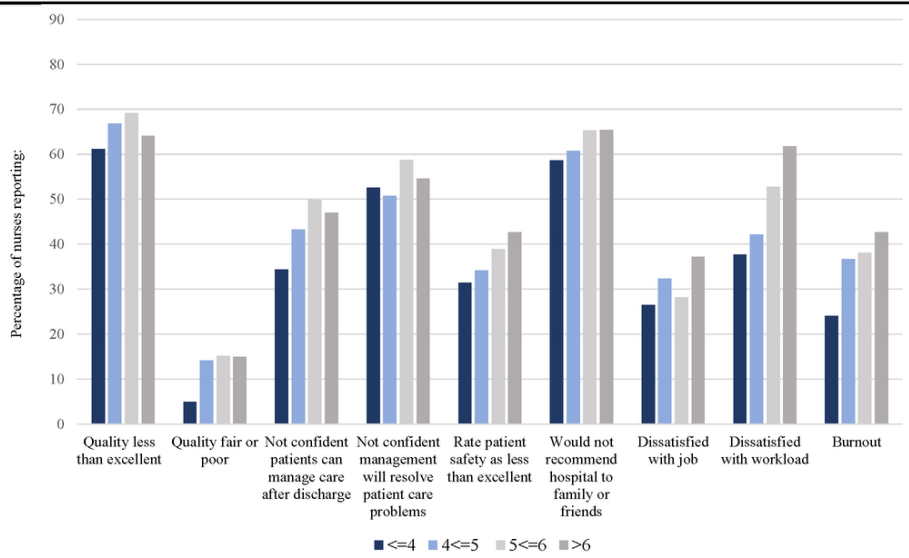

93x71mm (300 x 300 DPI)

**STROBE 2007 (v4) Statement—Checklist of items that should be included in reports of *cross-sectional studies***

| Section/Topic                | Item # | Recommendation                                                                                                                                                                       | Reported on page # |
|------------------------------|--------|--------------------------------------------------------------------------------------------------------------------------------------------------------------------------------------|--------------------|
| <b>Title and abstract</b>    | 1      | (a) Indicate the study’s design with a commonly used term in the title or the abstract                                                                                               | 3                  |
|                              |        | (b) Provide in the abstract an informative and balanced summary of what was done and what was found                                                                                  | 1                  |
| <b>Introduction</b>          |        |                                                                                                                                                                                      |                    |
| Background/rationale         | 2      | Explain the scientific background and rationale for the investigation being reported                                                                                                 | 3                  |
| Objectives                   | 3      | State specific objectives, including any prespecified hypotheses                                                                                                                     | 3                  |
| <b>Methods</b>               |        |                                                                                                                                                                                      |                    |
| Study design                 | 4      | Present key elements of study design early in the paper                                                                                                                              | 3                  |
| Setting                      | 5      | Describe the setting, locations, and relevant dates, including periods of recruitment, exposure, follow-up, and data collection                                                      | 4                  |
| Participants                 | 6      | (a) Give the eligibility criteria, and the sources and methods of selection of participants                                                                                          | 4                  |
| Variables                    | 7      | Clearly define all outcomes, exposures, predictors, potential confounders, and effect modifiers. Give diagnostic criteria, if applicable                                             | 4-5                |
| Data sources/<br>measurement | 8*     | For each variable of interest, give sources of data and details of methods of assessment (measurement). Describe comparability of assessment methods if there is more than one group | 4-5                |
| Bias                         | 9      | Describe any efforts to address potential sources of bias                                                                                                                            | 5                  |
| Study size                   | 10     | Explain how the study size was arrived at                                                                                                                                            | 4-5                |
| Quantitative variables       | 11     | Explain how quantitative variables were handled in the analyses. If applicable, describe which groupings were chosen and why                                                         | 4,                 |
| Statistical methods          | 12     | (a) Describe all statistical methods, including those used to control for confounding                                                                                                | 5                  |
|                              |        | (b) Describe any methods used to examine subgroups and interactions                                                                                                                  | n/a                |
|                              |        | (c) Explain how missing data were addressed                                                                                                                                          | 4                  |
|                              |        | (d) If applicable, describe analytical methods taking account of sampling strategy                                                                                                   | n/a                |
|                              |        | (e) Describe any sensitivity analyses                                                                                                                                                | n/a                |
| <b>Results</b>               |        |                                                                                                                                                                                      |                    |

1  
2  
3  
4  
5  
6  
7  
8  
9  
10  
11  
12  
13  
14  
15  
16  
17  
18  
19  
20  
21  
22  
23  
24  
25  
26  
27  
28  
29  
30  
31  
32  
33  
34  
35  
36  
37  
38  
39  
40  
41  
42  
43  
44  
45  
46

|                          |     |                                                                                                                                                                                                              |                            |
|--------------------------|-----|--------------------------------------------------------------------------------------------------------------------------------------------------------------------------------------------------------------|----------------------------|
| Participants             | 13* | (a) Report numbers of individuals at each stage of study—eg numbers potentially eligible, examined for eligibility, confirmed eligible, included in the study, completing follow-up, and analysed            | 4                          |
|                          |     | (b) Give reasons for non-participation at each stage                                                                                                                                                         | 4                          |
|                          |     | (c) Consider use of a flow diagram                                                                                                                                                                           | n/a                        |
| Descriptive data         | 14* | (a) Give characteristics of study participants (eg demographic, clinical, social) and information on exposures and potential confounders                                                                     | 5                          |
|                          |     | (b) Indicate number of participants with missing data for each variable of interest                                                                                                                          | n/a                        |
| Outcome data             | 15* | Report numbers of outcome events or summary measures                                                                                                                                                         | 5, 6                       |
| Main results             | 16  | (a) Give unadjusted estimates and, if applicable, confounder-adjusted estimates and their precision (eg, 95% confidence interval). Make clear which confounders were adjusted for and why they were included | 5, 6                       |
|                          |     | (b) Report category boundaries when continuous variables were categorized                                                                                                                                    | 5-6                        |
|                          |     | (c) If relevant, consider translating estimates of relative risk into absolute risk for a meaningful time period                                                                                             | n/a                        |
| Other analyses           | 17  | Report other analyses done—eg analyses of subgroups and interactions, and sensitivity analyses                                                                                                               | n/a                        |
| <b>Discussion</b>        |     |                                                                                                                                                                                                              |                            |
| Key results              | 18  | Summarise key results with reference to study objectives                                                                                                                                                     | 6                          |
| Limitations              | 19  | Discuss limitations of the study, taking into account sources of potential bias or imprecision. Discuss both direction and magnitude of any potential bias                                                   | 7                          |
| Interpretation           | 20  | Give a cautious overall interpretation of results considering objectives, limitations, multiplicity of analyses, results from similar studies, and other relevant evidence                                   | 6                          |
| Generalisability         | 21  | Discuss the generalisability (external validity) of the study results                                                                                                                                        | 6                          |
| <b>Other information</b> |     |                                                                                                                                                                                                              |                            |
| Funding                  | 22  | Give the source of funding and the role of the funders for the present study and, if applicable, for the original study on which the present article is based                                                | In manuscript details page |

\*Give information separately for cases and controls in case-control studies and, if applicable, for exposed and unexposed groups in cohort and cross-sectional studies.

**Note:** An Explanation and Elaboration article discusses each checklist item and gives methodological background and published examples of transparent reporting. The STROBE checklist is best used in conjunction with this article (freely available on the Web sites of PLoS Medicine at <http://www.plosmedicine.org/>, Annals of Internal Medicine at <http://www.annals.org/>, and Epidemiology at <http://www.epidem.com/>). Information on the STROBE Initiative is available at [www.strobe-statement.org](http://www.strobe-statement.org).

# BMJ Open

## The Case for Hospital Nurse-to-Patient Ratio Legislation in Queensland, Australia Hospitals: An Observational Study

|                                 |                                                                                                                                                                                                                                                                                                                                                                                                                                                                                                                                                                                                  |
|---------------------------------|--------------------------------------------------------------------------------------------------------------------------------------------------------------------------------------------------------------------------------------------------------------------------------------------------------------------------------------------------------------------------------------------------------------------------------------------------------------------------------------------------------------------------------------------------------------------------------------------------|
| Journal:                        | <i>BMJ Open</i>                                                                                                                                                                                                                                                                                                                                                                                                                                                                                                                                                                                  |
| Manuscript ID                   | bmjopen-2019-036264.R1                                                                                                                                                                                                                                                                                                                                                                                                                                                                                                                                                                           |
| Article Type:                   | Original research                                                                                                                                                                                                                                                                                                                                                                                                                                                                                                                                                                                |
| Date Submitted by the Author:   | 27-May-2020                                                                                                                                                                                                                                                                                                                                                                                                                                                                                                                                                                                      |
| Complete List of Authors:       | McHugh, Matthew; University of Pennsylvania School of Nursing, Philadelphia, PA, USA mchughm@nursing.upenn.edu., Center for Health Outcomes and Policy Research<br>Aiken, Linda; University of Pennsylvania, School of Nursing;<br>Windsor, Carol; Queensland University of Technology, School of Nursing<br>Douglas, Clint ; Queensland University of Technology Faculty of Health, School of Nursing<br>Dierkes, Andrew; University of Pennsylvania, School of Nursing, Center for Health Outcomes and Policy Research<br>Yates, Patsy; Queensland University of Technology, School of Nursing |
| <b>Primary Subject Heading</b>: | Nursing                                                                                                                                                                                                                                                                                                                                                                                                                                                                                                                                                                                          |
| Secondary Subject Heading:      | Health services research, Health policy                                                                                                                                                                                                                                                                                                                                                                                                                                                                                                                                                          |
| Keywords:                       | Health policy < HEALTH SERVICES ADMINISTRATION & MANAGEMENT, Quality in health care < HEALTH SERVICES ADMINISTRATION & MANAGEMENT, International health services < HEALTH SERVICES ADMINISTRATION & MANAGEMENT                                                                                                                                                                                                                                                                                                                                                                                   |
|                                 |                                                                                                                                                                                                                                                                                                                                                                                                                                                                                                                                                                                                  |

SCHOLARONE™  
Manuscripts



I, the Submitting Author has the right to grant and does grant on behalf of all authors of the Work (as defined in the below author licence), an exclusive licence and/or a non-exclusive licence for contributions from authors who are: i) UK Crown employees; ii) where BMJ has agreed a CC-BY licence shall apply, and/or iii) in accordance with the terms applicable for US Federal Government officers or employees acting as part of their official duties; on a worldwide, perpetual, irrevocable, royalty-free basis to BMJ Publishing Group Ltd ("BMJ") its licensees and where the relevant Journal is co-owned by BMJ to the co-owners of the Journal, to publish the Work in this journal and any other BMJ products and to exploit all rights, as set out in our [licence](#).

The Submitting Author accepts and understands that any supply made under these terms is made by BMJ to the Submitting Author unless you are acting as an employee on behalf of your employer or a postgraduate student of an affiliated institution which is paying any applicable article publishing charge ("APC") for Open Access articles. Where the Submitting Author wishes to make the Work available on an Open Access basis (and intends to pay the relevant APC), the terms of reuse of such Open Access shall be governed by a Creative Commons licence – details of these licences and which [Creative Commons](#) licence will apply to this Work are set out in our licence referred to above.

Other than as permitted in any relevant BMJ Author's Self Archiving Policies, I confirm this Work has not been accepted for publication elsewhere, is not being considered for publication elsewhere and does not duplicate material already published. I confirm all authors consent to publication of this Work and authorise the granting of this licence.



1  
2  
3 **The Case for Hospital Nurse-to-Patient Ratio Legislation in Queensland, Australia**  
4 **Hospitals: An Observational Study**  
5

6 Matthew D. McHugh (Corresponding Author)  
7 Independence Chair for Nursing Education, Professor of Nursing  
8 University of Pennsylvania School of Nursing, Center for Health Outcomes and Policy  
9 Research  
10 418 Curie Blvd.  
11 Philadelphia, PA, USA 19104  
12 +1215-746-0205  
13 mchughm@nursing.upenn.edu  
14  
15

16 Linda H. Aiken  
17 The Claire M. Fagin Leadership Professor of Nursing  
18 Professor of Sociology  
19 University of Pennsylvania School of Nursing, Center for Health Outcomes and Policy  
20 Research  
21 Philadelphia, PA, USA  
22

23 Carol Windsor  
24 Associate Professor  
25 Queensland University of Technology School of Nursing  
26 Brisbane, QLD, Australia  
27

28 Clint Douglas  
29 Professor and Nursing Chair  
30 Queensland University of Technology School of Nursing  
31 Metro North Hospital and Health Service  
32 Brisbane, QLD, Australia  
33

34 Andrew Dierkes  
35 Post-doctoral fellow  
36 University of Pennsylvania School of Nursing, Center for Health Outcomes and Policy  
37 Research  
38 Philadelphia, PA, USA  
39  
40

41 Patsy Yates  
42 Distinguished Professor  
43 Queensland University of Technology School of Nursing  
44 Brisbane, QLD, Australia  
45

46 Word count: 2919  
47  
48  
49  
50  
51  
52  
53  
54  
55  
56  
57  
58  
59  
60

## Abstract

**Objectives.** To determine whether there was variation in nurse staffing across hospitals in Queensland prior to implementation of nurse-to-patient ratio legislation targeting medical-surgical wards, and if so, the extent to which nurse staffing variation was associated with poor outcomes for patients and nurses.

**Design.** Analysis of cross-sectional data derived from nurse surveys linked with admitted patient outcomes data.

**Setting.** Public hospitals in Queensland.

**Participants.** 4,372 medical-surgical nurses and 146,456 patients in 68 public hospitals.

**Main Outcome Measures.** 30-day mortality, quality and safety indicators, nurse outcomes including emotional exhaustion and job dissatisfaction.

**Results.** Medical-surgical nurse-to-patient ratios before implementation of ratio legislation varied significantly across hospitals (mean 5.52 patients per nurse; SD = 2.03). After accounting for patient characteristics and hospital size, each additional patient per nurse was associated with 12% higher odds of 30-day mortality (OR=1.12; 95% CI 1.01–1.26). Each additional patient per nurse was associated with poorer outcomes for nurses including 15% higher odds of emotional exhaustion (OR = 1.15; 95% CI 1.07–1.23) and 14% higher odds of job dissatisfaction (OR = 1.14; 95% CI 1.02–1.28), as well as higher odds of concerns about quality of care (OR = 1.12; 95% CI 1.01–1.25) and patient safety (OR = 1.32; 95% CI 1.11–1.57).

**Conclusions.** Before ratios were implemented, nurse staffing varied considerably across Queensland hospital medical-surgical wards and higher nurse workloads were associated with patient mortality, low quality of care, nurse emotional exhaustion, and job dissatisfaction. The considerable variation across hospitals and the link with outcomes suggests that taking action to improve staffing levels was prudent.

## Article Summary

### Strengths and limitations of this study:

- Similar study design and measures to other published international studies examining the relationship between nurse staffing and outcomes.
- Study done just before implementation of ratios policy to quantify the scope of the variation in staffing and relationship with outcomes in the state.
- Measure of staffing derived directly from staff nurses.
- Indicators of quality, safety, job dissatisfaction, and emotional exhaustion from nurses as well as risk-adjusted patient outcome data on mortality.
- A limitation of cross-sectional data is that we cannot confirm that observed associations are causal, although studies using longitudinal data suggest that cross-sectional results closely approximate longitudinal panel results.

## The Case for Hospital Nurse-to-Patient Ratio Legislation in Queensland, Australia Hospitals: An Observational Study

Nurses provide round-the-clock care at the hospital bedside and act as a surveillance safety net for acutely ill patients. Having enough nurses with a manageable workload is important to ensure that nurses can effectively and consistently manage patient care needs, coordinate care, preempt clinical deterioration, prevent harm, and provide education for patients and families. There is strong evidence over decades internationally showing that patients cared for in hospitals with more patients per nurse have worse outcomes including mortality, adverse events, infections, and readmissions, compared with similar patients in hospitals with fewer patients per nurse.<sup>1-10</sup>

Responding to this growing evidence, the International Council of Nurses released a position statement on safe staffing in 2018, encouraging nursing organizations and governments to establish evidence-based staffing systems and policies.<sup>11</sup> A policy intervention often discussed, but rarely implemented is setting minimum nurse-to-patient ratios. Very few places around the world that have taken up such policies—California in the US, the state of Victoria in Australia, Wales, and Ireland are examples. As a result of this policy in California, the average medical or surgical unit nurse workload in California hospitals was one patient lower than in other states. Having fewer patients per nurse was associated with significantly lower patient mortality and nurse emotional exhaustion and job dissatisfaction, as well as better nurse-reported quality of care.<sup>4</sup> The state of Queensland, Australia, joined this short list when, on 1 July 2016, Queensland Health established minimum nurse-to-patient ratios for acute adult medical-surgical wards in 27 prescribed public hospitals across the state. The legislation requires that the average nurse-to-patient ratio on morning/afternoon shifts must be no less than 1:4 and on night shifts no less than 1:7.<sup>12</sup>

The purpose of this analysis was to determine the extent to which nurse-to-patient ratios varied across Queensland Health hospitals before the ratios legislation, and to evaluate the relationship between nurse-to-patient ratios and outcomes including patient mortality, quality and safety indicators, and nurse job outcomes including emotional exhaustion and job dissatisfaction. While minimum ratio policies have been implemented elsewhere, this is the first baseline evaluation of the need for such legislation. A common criticism of ratio policies is that there is not empirical evidence of a problem with staffing levels specific to the jurisdiction and intervention is not needed. The results will help determine if there was an empirical basis for the legislation, and will establish a baseline level of nurse staffing and patient outcomes against which to compare the impact of the legislation in the future.

### Methods

We conducted a cross-sectional analysis of data from surveys of Queensland hospital nurses and patient outcomes data. We linked individual surgical patient outcomes data with the aggregated nurse survey data describing medical-surgical nurse-to-patient ratios using a common hospital identifier. We described facility-level medical-surgical nurse staffing levels across hospitals and evaluated whether staffing levels were associated with outcomes. The approach is based on previous research using these same methods to study the relationship between nurse-to-patient ratios and outcomes in other countries.<sup>3,13</sup> The theoretical foundation for this organizational-level factors approach to studying outcomes is grounded in the Quality Health Outcomes Model, which suggests that the context in which care is delivered, including

1  
2  
3 the staffing adequacy, affects quality of care and patient outcomes.<sup>14</sup> Ethics approval was  
4 obtained from the Queensland University of Technology and the University of Pennsylvania.

### 5 6 Study Population and Data Sources

#### 7 8 *Nurse Survey*

9  
10 We surveyed nurses to collect detailed information about their hospitals that is not  
11 available from any other source. We take advantage of nurses as informants of the  
12 organizational context in which care takes place because they are positioned at the bedside  
13 providing care, they are present 24 hours a day, and they communicate and work directly with  
14 doctors, other providers, patients and families, and hospital managers. This method of  
15 measuring organizational features of hospitals is more accurate than reports by a single “key  
16 informant” within a hospital and is supported by the organizational research literature.<sup>15</sup> We  
17 used the nurse survey data to create measures of acute adult medical-surgical nurse-to-patient  
18 ratios, quality of care and patient safety indicators, as well as individual nurse job outcomes  
19 (i.e., emotional exhaustion and job dissatisfaction).

20  
21 The baseline nurse survey data were collected between May and June 2016 before  
22 implementation of ratios in July 2016. We used a modified Dillman<sup>16</sup> approach for email  
23 survey campaigns. We sent emails and reminders to 28,708 licensed nurses (all those with an  
24 available email address provided by the nurses’ union, which accounted for 90% of all  
25 hospital nurses) and received responses from 8,412 nurses, including 4,372 nurses who self-  
26 identified as working on a medical-surgical ward, giving an overall response rate of 29%. Our  
27 primary concern regarding representativeness, however, is at the hospital level; our sample of  
28 68 public hospitals includes all Queensland public hospitals with  $\geq 50$  beds and over half with  
29  $< 50$  beds. The average hospital was represented by 64 respondents; thus, the preponderance  
30 of Queensland public hospitals and all prescribed for ratios are represented. We provided  
31 respondents with a list of hospitals to identify their hospital, allowing us to aggregate  
32 responses and attribute medical-surgical nurse staffing information to their hospital and link  
33 with patient outcomes data.

#### 34 35 36 37 *Patient Data*

38  
39 To examine the relationship between adult acute medical-surgical nurse staffing and  
40 patient outcomes, we used state-based clinical patient discharge data (the Queensland  
41 Hospital Admitted Patient Data) specific to general surgery, orthopedic, and vascular surgery  
42 patients. These conditions were selected because they account for a substantial share of  
43 hospital admissions (about one-third of all adult surgical and medical patients in Queensland),  
44 most hospitals care for these patients, and there are well established risk-adjustment  
45 methods.<sup>17,18</sup> This population is also consistent with other large studies evaluating the  
46 relationship between nurse staffing levels and patient outcomes internationally, which allows  
47 us to ascertain whether any evidence for this relationship in Queensland is similar or different  
48 from what has been observed outside of Australia.<sup>2,3,10</sup> The clinical information on patient  
49 outcomes was derived from the Queensland Hospital Admitted Patient Data, a database  
50 representing information on all inpatients in Queensland hospitals. These data were used to  
51 create the patient outcome indicator of 30-day mortality; these files also provide information  
52 on patient demographics, diagnoses and procedures (ICD10-AM coding), comorbidities, and  
53 discharge status. The files were linked with vital statistic death records allowing us to  
54 measure the outcome of 30-day mortality. There were no missing data in the population under  
55 investigation on variables of interest for this study.

### *Patient and public involvement*

This study utilized secondary patient data from a deidentified pre-existing data set—the Queensland Hospital Admitted Patient Data. The survey of nurses was based on an established survey used in international research so that findings could be placed in the context of the broader international literature on the relationship between nurse staffing and outcomes. Thus, patients and nurses were not directly involved in the development of the research questions, variable measures, or study design.

### Measures

#### *Nurse-to-patient ratios*

*Nurse-to-patient ratios.* Our primary measure of interest was the average nurse-to-patient ratios on non-ICU adult acute medical-surgical units (hereafter referred to as nurse-to-patient ratios). To be consistent with the legislation, “nurse” refers to both registered and enrolled nurses. By asking survey questions about how many nurses and how many patients were on the ward during the last shift, we obtain a nurse-to-patient ratio measure reflecting the average nurse-to-patient ratio for medical-surgical wards. This is consistent with the ratios legislation, which allows individual nurses to have a greater (or lesser) number of patients than the prescribed ratio so long as the ward average does not fall short during the shift. After aggregating these reports to the hospital level, this measure reflects the average nurse-to-patient ratio across all medical-surgical wards in the hospital and across shifts. This reflects the reality that over the course of a hospitalization, patients receive care from various nurses across multiple shifts and, often, in more than one hospital unit. Patient outcomes are determined, in part, by their exposure to staffing levels over the course of their hospitalization, which is captured by this aggregated measure. We express the ratio as the number of patients per nurse, which allows us to interpret our model results in terms of the effect of each additional patient per nurse on each outcome.

#### *Outcomes*

*Mortality.* We used the Queensland Hospital Admitted Patient Data to evaluate the outcome of 30-day mortality. In our mortality models, we included indicators from the Charlson comorbidity index to account for comorbidities.<sup>19-23</sup> We also included variables indicating sex and age along with dummy variables for 78 surgical procedure types.

*Quality of care and patient safety.* Our survey allowed us to collect information reflecting nurses’ assessments of a number of quality and safety indicators in their wards. Measures included the overall quality of care, the culture of safety, confidence that discharged patients are ready to care for themselves, confidence that management will resolve patient care concerns raised by nurses, and whether nurses would recommend the hospital to family and friends in need of care.<sup>24</sup> Evidence shows that nurse-reported quality indicators correspond closely with objective patient outcomes measures like mortality.<sup>25,26</sup>

*Nurse outcomes.* As in prior work,<sup>2,13,27</sup> emotional exhaustion, a key feature of burnout, was measured using the Emotional Exhaustion subscale of the Maslach Burnout Inventory.<sup>28-29</sup> Nurses were classified as being “emotionally exhausted” if their score was higher than the published average for health care workers ( $\geq 27$ ). Job dissatisfaction was measured using nurses’ responses to the question, “How satisfied are you with your current job?” The four-point Likert-type scale response options range from very satisfied to very dissatisfied. We dichotomized the measure such that nurses who reported being either very



dissatisfied or a little dissatisfied were described as “dissatisfied” and nurses reporting being moderately satisfied or very satisfied were described as “satisfied.”<sup>27</sup>

### Statistical Analysis

We first described nurse-to-patient ratios across Queensland Health hospitals. We then examined the relationship between nurse-to-patient ratios and patient mortality among general, orthopedic, or vascular surgery patients. We employed a series of robust multi-level logistic regression models, accounting for clustering of patients within hospitals. We began with the unadjusted bivariate relationship between nurse staffing and mortality. Then we estimated adjusted models that included covariates to account for the various patient characteristics (e.g., age, sex, comorbidities, surgical procedure) and hospital size. To evaluate the relationship between nurse-to-patient ratios and nurse job outcomes and the nurse-reported quality and safety indicators, we used robust logistic regression models, which take account of the clustering of nurses within hospitals, to estimate the odds of nurses reporting each outcome relative to an additional patient per nurse. We estimated these models before and after adjusting for hospital size and for nurse characteristics including age, sex, and years of experience.

### **Results**

**Table 1** shows the characteristics of the 68 public Queensland Health hospitals with both patient data and nurse-to-patient ratio data. The average medical-surgical staffing ratios across all shifts was 5.52 patients per nurse (SD=2.03). For morning and afternoon shifts, the average was 5.07 (SD=1.85) patients per nurse, while for night shifts the average was 7.4 (SD=2.3) patients per nurse.

**Table 2** shows the characteristics of our surgical patient population. Our analysis included 146,456 general, orthopedic, and vascular surgery patients. The average mortality rate was relatively low overall (1.13%) and is consistent with findings in Europe and the US.<sup>2,5</sup> **Table 3** shows that the variation in nurse-to-patient ratios on medical-surgical wards had consequences for patients. After accounting for patient characteristics and hospital size, each additional patient per medical-surgical nurse was associated with 12% higher odds of death (OR=1.12; 95% CI 1.01–1.26). These results are multiplicative such that an additional two patients per nurse would be associated with 25% higher odds of death (OR = 1.12<sup>2</sup> or 1.25).

**Figure 1** shows how the percentage of nurses reporting quality, safety, and job outcomes varied in hospitals with different morning/afternoon staffing levels in terms of patients per nurse ( $\leq 4$ ;  $4 \leq 5$ ;  $5 \leq 6$ ;  $> 6$ ). In all cases, a smaller proportion of nurses reported negative outcomes in hospitals with an average of  $\leq 4$  patients per nurse. For example, only about 5% of nurses in hospitals with  $\leq 4$  patients per nurse reported that quality of care is only fair or poor on their unit, while 15% of nurses in hospitals with an average of  $5 \leq 6$  patients per nurse rated their hospital poorly. Twenty four percent of nurses in hospitals with the best staffing levels met the criteria for emotional exhaustion, while 43% of nurses in hospitals with  $> 6$  patients per nurse were emotionally exhausted.

**Table 4** shows that in all but one instance (*confidence patients can manage care after discharge*), higher workloads (i.e., worse nurse-to-patient ratios) were consistently associated with worse quality and safety. After accounting for individual nurse characteristics and hospital size, each additional patient per nurse was associated with 30% higher odds of a nurse not recommending the hospital to family or friends (OR = 1.30; 95% CI 1.14–1.49),

32% higher odds of rating patient safety at their hospital as less than excellent (OR = 1.32; 95% CI 1.11–1.57), and 12% higher odds of rating quality as less than excellent (OR = 1.12; 95% CI 1.01–1.25). Each additional patient per nurse was associated with 15% higher odds of emotional exhaustion (OR = 1.15; 95% CI 1.07–1.23) and 14% higher odds of job dissatisfaction (OR = 1.14; 95% CI 1.02–1.28). These coefficients are also multiplicative; for example, an additional two patients per nurse would be associated with 69% higher odds of not recommending the hospital to family or friends (OR = 1.30<sup>2</sup> or 1.69).

## Discussion

Nurse-to-patient ratios varied considerably across Queensland Health hospitals and worse nurse-to-patient ratios were linked with patient mortality, worse quality of care and patient safety, and nurse emotional exhaustion and job dissatisfaction. The finding that each additional patient per nurse was associated with increased odds of mortality is consistent with results from studies in the United States and Europe based on a similar protocol.<sup>2,3</sup> Queensland is one of the few places worldwide to implement minimum nurse-to-patient ratios. While some evaluation of these policies have taken place in these other locations, this is the first baseline study of staffing ratios prior to policy implementation.

Nurse-to-patient ratios are not just important for patients; poor ratios can negatively affect nurses in terms of emotional exhaustion and job dissatisfaction, which are associated with costly turnover.<sup>30-31</sup> The National Academy of Medicine's newest landmark report, *Taking Action Against Clinician Burnout: A Systems Approach to Professional Well-Being*,<sup>32</sup> highlights the central role that system factors like inadequate staffing play in the growing burnout and emotional exhaustion levels among clinicians. Our findings in Queensland are consistent with those reported in the US and Europe regarding the link between staffing and job dissatisfaction, emotional exhaustion, and concerns about quality and safety.<sup>2,13,24</sup> Studies have shown that hospitals that improved in terms of nurse staffing significantly lowered rates of emotional exhaustion among their nurses.<sup>33</sup> These outcomes are also important indicators of hospital performance because of their relationship to patient outcomes; for example, research has shown that hospitals with many dissatisfied nurses also had higher proportions of dissatisfied patients.<sup>27,34</sup>

Nurse staffing is necessary but not sufficient to ensure good outcomes. Research suggests that hospitals with good work environments—where nurses have autonomy, opportunities for advancement, support and trust of management, excellent relationships built on professional respect with physician colleagues, and active engagement in organizational decision-making—have better outcomes for nurses and patients.<sup>24,33,35,36,37</sup> The benefits of better nurse staffing are conditional on having a good work environment; thus, investing in more staff without considering the environment in which those staff work may fall short of expected improvements.<sup>37</sup> Creating good work environments are directly within the control of management, and although they have much less associated cost than investments in more staff, they require purposeful effort. One example of an intervention aimed at improving the work environment along these domains is the Magnet hospital recognition program. Studies show that outcomes for nurses and patients are better in Magnet hospitals, and hospitals that have pursued Magnet recognition have seen improvements beyond those seen in hospitals that have not gone through this transformation.<sup>38,39</sup> There is only one Magnet hospital in Queensland.

A potential limitation of our study is that our data are cross-sectional. This is often suggested to imply a reduced ability to establish a conclusive causal relationship between



1  
2  
3 nurse staffing levels and nurse and patient outcomes. However, we note that studies that have  
4 simultaneously considered longitudinal associations with cross-sectional associations suggest  
5 that the cross-sectional findings are reasonably close to what would be observed if we were  
6 able to examine how changes in staffing over time align with changes in outcomes.<sup>24</sup> Future  
7 research should directly employ a longitudinal design to confirm whether our cross-sectional  
8 findings are truly causative. Additionally, because all of our outcomes (apart from mortality)  
9 are nurse reported, further research using more outcomes from other sources would increase  
10 the robustness of the findings. We focus on nurses in medical surgical wards, aggregating to  
11 the hospital level, and cannot separate specific units within that unit type, although significant  
12 variation in staffing is limited across units of the same type within the same hospital.  
13  
14

### 15 **Conclusion.**

16  
17 The International Council of Nurses' 2018 position statement on safe staffing<sup>11</sup> highlighted  
18 the large body of international literature suggesting a consistent relationship between nurse  
19 staffing and good outcomes. Our findings in Queensland are consistent with this evidence-  
20 base and suggest that taking action to improve staffing was a reasonable policy approach that  
21 could lead to improved patient safety and quality.  
22  
23  
24  
25  
26  
27  
28  
29  
30  
31  
32  
33  
34  
35  
36  
37  
38  
39  
40  
41  
42  
43  
44  
45  
46  
47  
48  
49  
50  
51  
52  
53  
54  
55  
56  
57  
58  
59  
60

**Table 1** Hospital characteristics (N=68)

|                                                           | N    | %      |
|-----------------------------------------------------------|------|--------|
| <b>Beds</b>                                               |      |        |
| <50                                                       | 39   | 57%    |
| 50-99                                                     | 8    | 12%    |
| 100-199                                                   | 5    | 7%     |
| 200-500                                                   | 11   | 16%    |
| >500                                                      | 5    | 7%     |
| <b>Medical-surgical patients per nurse</b>                |      |        |
| 4 or fewer patients per nurse                             | 13   | 19%    |
| 4<=5 patients per nurse                                   | 26   | 38%    |
| 5<=6 patients per nurse                                   | 17   | 25%    |
| >6 patients per nurse                                     | 12   | 18%    |
| <b>Mean medical-surgical patients per nurse, by shift</b> |      |        |
|                                                           | Mean | (SD)   |
| All shifts                                                | 5.52 | (2.03) |
| Morning/afternoon shifts                                  | 5.07 | (1.85) |
| Night shifts                                              | 7.38 | (2.30) |

**Table 2** Characteristics of surgical patients (N=146,456)

| Characteristic         | n      | %      |
|------------------------|--------|--------|
| Age (years), mean (SD) | 62.8   | (17.9) |
| Male                   | 71,616 | 48.9%  |
| Surgical category      |        |        |
| General surgery        | 44,229 | 30.2%  |
| Orthopedic surgery     | 49,062 | 33.5%  |
| Vascular surgery       | 52,165 | 36.3%  |
| 30-day mortality       | 1,654  | 1.13%  |

**Table 3** Unadjusted and adjusted odds-ratios (OR) for relationship between number of medical-surgical patients per nurse and 30-day mortality (N=146,456)

|                  | Unadjusted |       |               | Adjusted |       |               |
|------------------|------------|-------|---------------|----------|-------|---------------|
|                  | OR         | P     | (95% C.I.)    | OR       | P     | (95% C.I.)    |
| 30-day mortality | 0.90       | 0.186 | (0.78 – 1.05) | 1.12     | 0.048 | (1.01 – 1.26) |

Notes: Logistic regression models adjusting for patient characteristics including age, sex, 17 comorbidities [myocardial infarction, congestive heart failure; peripheral vascular; cerebrovascular disease; dementia; chronic obstructive pulmonary; rheumatoid disease; peptic ulcer; mild liver disease; diabetes; diabetes with complications; hemiplegia or paraplegia; renal disease; cancer; moderate/severe liver disease; metastatic cancer; AIDS], 78 specific surgical procedures, as well as hospital size.

**Table 4** Unadjusted and adjusted odds-ratios (OR) indicating the relationship between nurse staffing and quality of care and safety indicators (N=4,372)

|                                                             | Unadjusted |          |             | Adjusted |          |             |
|-------------------------------------------------------------|------------|----------|-------------|----------|----------|-------------|
|                                                             | OR         | <i>p</i> | (95% C.I.)  | OR       | <i>p</i> | (95% C.I.)  |
| <b>Quality and Safety Outcomes</b>                          |            |          |             |          |          |             |
| Quality less than excellent                                 | 1.12       | 0.049    | (1.00–1.25) | 1.12     | 0.037    | (1.01–1.25) |
| Quality fair or poor                                        | 1.18       | 0.004    | (1.05–1.31) | 1.17     | 0.003    | (1.05–1.31) |
| Rate patient safety as less than excellent                  | 1.33       | 0.002    | (0.99–1.52) | 1.32     | 0.002    | (1.11–1.57) |
| Not confident patients can manage care after discharge      | 1.09       | 0.091    | (0.99–1.21) | 1.06     | 0.247    | (0.96–1.16) |
| Not confident management will resolve patient care problems | 1.18       | 0.034    | (1.01–1.37) | 1.16     | 0.041    | (1.01–1.35) |
| Would not recommend hospital to family or friends           | 1.29       | <0.000   | (1.12–1.49) | 1.30     | <0.000   | (1.14–1.49) |
| <b>Job Outcomes</b>                                         |            |          |             |          |          |             |
| Dissatisfied with job                                       | 1.17       | 0.006    | (1.05–1.31) | 1.14     | 0.018    | (1.02–1.28) |
| Dissatisfied with workload                                  | 1.37       | <0.000   | (1.22–1.53) | 1.36     | <0.000   | (1.20–1.53) |
| Emotional exhaustion                                        | 1.14       | <0.000   | (1.07–1.23) | 1.15     | <0.000   | (1.07–1.23) |

Notes: Logistic regression models adjusting for nurse characteristics (age, sex, years of experience) as well as hospital size.

### Contributorship statement

All authors meet the criteria recommended by the International Committee of Medical Journal Editors (ICMJE). MDM, LHA, CW, CD, AD, and PY contributed to the original idea and design of the study. MDM, LHA, CW, CD, and PY contributed to the collection of data. MDM and AD conducted the data analysis. All authors contributed to the interpretation of the data and preparation of the submitted manuscript. All authors approved the submitted manuscript.

### Competing interests

None declared

### Funding

This investigation was supported by Queensland Health (project NM006239/RP731123). The funders had no role in the study design, data collection and analysis, decision to publish or preparation of the manuscript. The researchers are solely responsible for the findings and their interpretation and do not necessarily represent the views or conclusions of Queensland Health.

### Acknowledgement

We would like to acknowledge Tim Cheney, Frances Hughes, Irene Hung, Beth Mohle, Shelley Nowlan, Douglas Sloane, and Natalie Spearing for their contributions to this work.

### Data sharing statement

The nurse survey data are not available. The patient data are from the Queensland Admitted Patient Data Collection and approval for their use can be requested directly from Queensland Health.

### Figure legend

Figure 1. Percentage of nurses reporting quality, safety, and job outcomes across facilities with varying nurse-to-patient ratios.

## References

1. Haegdorens F, Van Bogaert P, De Meester K, Monsieurs KG. The impact of nurse staffing levels and nurse's education on patient mortality in medical and surgical wards: an observational multicentre study. *BMC Health Serv Res* 2019;19:1-9.
2. Aiken LH, Clarke SP, Sloane DM, Sochalski J, Silber JH. Hospital nurse staffing and patient mortality, nurse burnout, and job dissatisfaction. *JAMA* 2002;288:1987-1993.
3. Aiken LH, Sloane DM, Bruyneel L, et al. Nurse staffing and education and hospital mortality in nine European countries: a retrospective observational study. *The Lancet* 2014;383:1824-1830.
4. Aiken LH, Sloane DM, Cimiotti JP, et al. Implications of the California nurse staffing mandate for other states. *Health Serv Res* 2010;45:904-921.
5. Duffield C, Diers D, O'Brien-Pallas L, et al. Nursing staffing, nursing workload, the work environment and patient outcomes. *Appl Nurs Res* 2010;24:244-255.
6. Lasater KB, McHugh MD. Nurse staffing and the work environment linked to readmissions among older adults following elective total hip and knee replacement. *Int J Quality Health Care* 2016;28:253-258.
7. Griffiths P, Maruotti A, Saucedo AR, et al. Nurse staffing, nursing assistants and hospital mortality: retrospective longitudinal cohort study. *BMJ Qual Saf* 2019;28:609-617.
8. Carthon JMB, Davis L, Dierkes A, et al. Association of nurse engagement and nurse staffing on patient safety. *J Nurs Care Qual* 2019;34:40-46.
9. Needleman J, Buerhaus P, Pankratz VS, Leibson CL, Stevens SR, Harris M. Nurse staffing and inpatient hospital mortality. *N Engl J Med* 2011;364:1037-1045.
10. Silber JH, Rosenbaum, PR, McHugh MD, et al. Comparison of the value of nursing work environments in hospitals across different levels of patient risk. *JAMA Surg* 2016;151:527-536.
11. International Council of Nurses (2018) Evidence-based safe nurse staffing: position statement. [cited 2020 May 21]. Available from: <https://www.icn.ch/nursing-policy/position-statements>
12. Palaszczuk A, Dick C. Nurse to patient ratio legislation introduced. Media statement. 2015 Dec 01. Available from: <http://statements.qld.gov.au/Statement/2015/12/1/nurse-to-patient-ratio-legislation-introducedaw>
13. Aiken LH, Sermeus W, Vanden Heede K, et al. Patient safety, satisfaction, and quality of hospital care: cross-sectional surveys of nurses and patients in 12 countries in Europe and the United States. *BMJ*. 2012;344:e1717.
14. Mitchell PH, Ferketich S, Jennings BM, American Academy of Nursing Expert Panel on Quality Health Care. Quality health outcomes model. *Image J Nurs Sch* 1998;30:43-46.
15. Aiken M, Hage J. Organizational interdependence and intra-organizational structure. *Am Sociol Rev* 1968;33:912-930.
16. Dillman DA, Smyth JD, Christian LM. Internet, Phone, Mail, and Mixed-Mode Surveys: The Tailored Design Method. Hoboken, New Jersey: John Wiley & Sons; 2014.

17. Patel MS, Volpp KG, Small DS, et al. Association of the 2011 ACGME resident duty hour reforms with mortality and readmissions among hospitalized Medicare patients. *JAMA* 2014;312:2364-2373.
18. Volpp KG, Rosen AK, Rosenbaum PR, et al. Mortality among hospitalized Medicare beneficiaries in the first 2 years following ACGME resident duty hour reform. *JAMA* 2007;298:975-983.
19. Charlson M, Szatrowski TP, Peterson J, Gold J. Validation of a combined comorbidity index. *J Clin Epidemiol* 1994;47:1245-1251.
20. Li B, Evans D, Faris P, Dean S, Quan H. Risk adjustment performance of Charlson and Elixhauser comorbidities in ICD-9 and ICD-10 administrative databases. *BMC Health Serv Res* 2008;8:12-19.
21. Quan H, Li B, Couris CM, et al. Updating and validating the Charlson comorbidity index and score for risk adjustment in hospital discharge abstracts using data from 6 countries. *Am J Epidemiol* 2011;173:676-682.
22. Quan H, Sundararajan V, Halfon P, et al. Coding algorithms for defining comorbidities in ICD-9-CM and ICD-10 administrative data. *Med Care* 2005;43:1130-1139.
23. Sundararajan V, Henderson T, Perry C, Muggivan A, Quan H, Ghali WA. New ICD-10 version of the Charlson comorbidity index predicted in-hospital mortality. *J Clin Epidemiol* 2004;57:1288-1294.
24. Sloane DM, Smith HL, McHugh MD, Aiken LH. Effect of changes in hospital nursing resources on improvements in patient safety and quality of care: A panel study. *Med Care* 2018;56:1001-1008.
25. McHugh MD, Stimpfel AW. Nurse reported quality of care: A measure of hospital quality. *Res Nurs Health* 2012;35:566-575.
26. Smeds Alenius L, Tishelman C, Lindqvist R, Runesdotter S, McHugh MD. RN assessments of excellent quality of care and patient safety are associated with significantly lower odds of 30-day inpatient mortality: a national cross-sectional study of acute-care hospitals. *Int J Nurs Stud* 2016;61:117-124.
27. McHugh MD, Kutney-Lee A, Cimiotti JP, Sloane DM, Aiken LH. Nurses' widespread job dissatisfaction, burnout and frustration with health benefits signal problems for patient care. *Health Aff* 2011;30:202-210.
28. Maslach C, & Jackson, S.E. *Maslach Burnout Inventory Manual*. 2nd ed. Palo Alto, CA: Consulting Psychologists Press.; 1986.
29. Maslach C, Jackson SE. Burnout in health professions: a social psychologists analysis. In: Saunders G, Suls J, eds. *Social Psychology of Health and Illness*. Hillsdale, NJ: Lawrence Erlbaum Association; 1982:227-251.
30. Gilmartin MJ. Thirty years of nursing turnover research: looking back to move forward. *Med Care Res Rev* 2013;70:3-28.
31. Hayes LJ, O'Brien-Pallas L, Duffield C, et al. Nurse turnover: a literature review - an update. *Int J Nurs Stud* 2012;49:887-905.



- 1  
2  
3 32. National Academies of Sciences Engineering and Medicine. Taking Action Against Clinician  
4 Burnout: A Systems Approach to Professional Well-Being. Washington, DC: The National  
5 Academies Press;2019.  
6  
7 33. Kutney-Lee A, Wu ES, Sloane DM, Aiken LH. Changes in hospital nurse work environments and  
8 nurse job outcomes: An analysis of panel data. *Int J Nurs Stud* 2013;50:195-201.  
9  
10 34. Vahey DC, Aiken LH, Sloane DM, Clarke SP, Vargas D. Nurse burnout and patient satisfaction.  
11 *Med Care* 2004;42:II57-66.  
12  
13 35. Aiken LH, Sloane DM, Barnes H, Cimiotti J, Jarrin O, McHugh MD. Nurses' and patients'  
14 appraisals show patient safety in hospitals is still deficient and recommended measures not  
15 implemented. *Health Aff* 2018;37:1744-1751.  
16  
17 36. McHugh MD, Aiken LH, Eckenhoff M, Burns LR. Achieving Kaiser Permanente quality. *Health*  
18 *Care Manage Rev* 2016;41:178-188.  
19  
20 37. Aiken LH, Cimiotti JP, Sloane DM, Smith HL, Flynn L, Neff DF. Effects of nurse staffing and  
21 nurse education on patient deaths in hospitals with different nurse work environments. *Med Care*  
22 2011;49(10):1047-1053.  
23  
24 38. Kutney-Lee A, Quinn L, Witkoski Stimpfel A, Sloane DM, Cimiotti J, Aiken LH. Changes in  
25 patient and nurse outcomes associated with Magnet hospital recognition. *Med Care* 2015;53:550-  
26 557.  
27  
28 39. McHugh MD, Kelly LA, Smith HL, Wu ES, Vanak J, Aiken LH. Lower mortality in Magnet  
29 hospitals. *Med Care* 2013;51:382-388.  
30  
31  
32  
33  
34  
35  
36  
37  
38  
39  
40  
41  
42  
43  
44  
45  
46  
47  
48  
49  
50  
51  
52  
53  
54  
55  
56  
57  
58  
59  
60

1  
2  
3  
4  
5  
6  
7  
8  
9  
10  
11  
12  
13  
14  
15  
16  
17  
18  
19  
20  
21  
22  
23  
24  
25  
26  
27  
28  
29  
30  
31  
32  
33  
34  
35  
36  
37  
38  
39  
40  
41  
42  
43  
44  
45  
46  
47  
48  
49  
50  
51  
52  
53  
54  
55  
56  
57  
58  
59  
60

Figure 1. Percentage of nurses reporting quality, safety, and job outcomes across hospitals with varying average number of patients per nurse

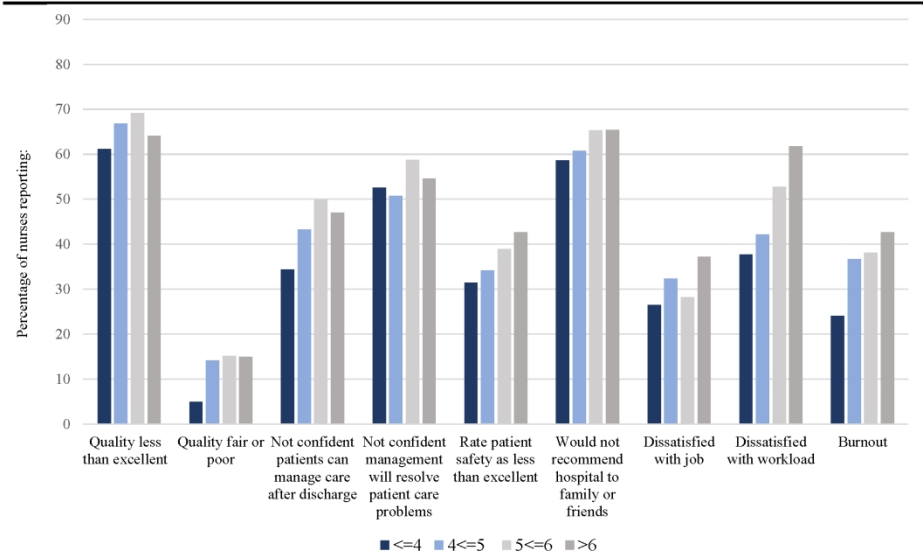

93x71mm (600 x 600 DPI)

**STROBE 2007 (v4) Statement—Checklist of items that should be included in reports of *cross-sectional studies***

| Section/Topic                | Item # | Recommendation                                                                                                                                                                       | Reported on page # |
|------------------------------|--------|--------------------------------------------------------------------------------------------------------------------------------------------------------------------------------------|--------------------|
| <b>Title and abstract</b>    | 1      | (a) Indicate the study's design with a commonly used term in the title or the abstract                                                                                               | 3                  |
|                              |        | (b) Provide in the abstract an informative and balanced summary of what was done and what was found                                                                                  | 1                  |
| <b>Introduction</b>          |        |                                                                                                                                                                                      |                    |
| Background/rationale         | 2      | Explain the scientific background and rationale for the investigation being reported                                                                                                 | 3                  |
| Objectives                   | 3      | State specific objectives, including any prespecified hypotheses                                                                                                                     | 3                  |
| <b>Methods</b>               |        |                                                                                                                                                                                      |                    |
| Study design                 | 4      | Present key elements of study design early in the paper                                                                                                                              | 3                  |
| Setting                      | 5      | Describe the setting, locations, and relevant dates, including periods of recruitment, exposure, follow-up, and data collection                                                      | 4                  |
| Participants                 | 6      | (a) Give the eligibility criteria, and the sources and methods of selection of participants                                                                                          | 4                  |
| Variables                    | 7      | Clearly define all outcomes, exposures, predictors, potential confounders, and effect modifiers. Give diagnostic criteria, if applicable                                             | 4-5                |
| Data sources/<br>measurement | 8*     | For each variable of interest, give sources of data and details of methods of assessment (measurement). Describe comparability of assessment methods if there is more than one group | 4-5                |
| Bias                         | 9      | Describe any efforts to address potential sources of bias                                                                                                                            | 5                  |
| Study size                   | 10     | Explain how the study size was arrived at                                                                                                                                            | 4-5                |
| Quantitative variables       | 11     | Explain how quantitative variables were handled in the analyses. If applicable, describe which groupings were chosen and why                                                         | 4,                 |
| Statistical methods          | 12     | (a) Describe all statistical methods, including those used to control for confounding                                                                                                | 5                  |
|                              |        | (b) Describe any methods used to examine subgroups and interactions                                                                                                                  | n/a                |
|                              |        | (c) Explain how missing data were addressed                                                                                                                                          | 4                  |
|                              |        | (d) If applicable, describe analytical methods taking account of sampling strategy                                                                                                   | n/a                |
|                              |        | (e) Describe any sensitivity analyses                                                                                                                                                | n/a                |
| <b>Results</b>               |        |                                                                                                                                                                                      |                    |

|                          |     |                                                                                                                                                                                                              |                            |
|--------------------------|-----|--------------------------------------------------------------------------------------------------------------------------------------------------------------------------------------------------------------|----------------------------|
| Participants             | 13* | (a) Report numbers of individuals at each stage of study—eg numbers potentially eligible, examined for eligibility, confirmed eligible, included in the study, completing follow-up, and analysed            | 4                          |
|                          |     | (b) Give reasons for non-participation at each stage                                                                                                                                                         | 4                          |
|                          |     | (c) Consider use of a flow diagram                                                                                                                                                                           | n/a                        |
| Descriptive data         | 14* | (a) Give characteristics of study participants (eg demographic, clinical, social) and information on exposures and potential confounders                                                                     | 5                          |
|                          |     | (b) Indicate number of participants with missing data for each variable of interest                                                                                                                          | n/a                        |
| Outcome data             | 15* | Report numbers of outcome events or summary measures                                                                                                                                                         | 5, 6                       |
| Main results             | 16  | (a) Give unadjusted estimates and, if applicable, confounder-adjusted estimates and their precision (eg, 95% confidence interval). Make clear which confounders were adjusted for and why they were included | 5, 6                       |
|                          |     | (b) Report category boundaries when continuous variables were categorized                                                                                                                                    | 5-6                        |
|                          |     | (c) If relevant, consider translating estimates of relative risk into absolute risk for a meaningful time period                                                                                             | n/a                        |
| Other analyses           | 17  | Report other analyses done—eg analyses of subgroups and interactions, and sensitivity analyses                                                                                                               | n/a                        |
| <b>Discussion</b>        |     |                                                                                                                                                                                                              |                            |
| Key results              | 18  | Summarise key results with reference to study objectives                                                                                                                                                     | 6                          |
| Limitations              | 19  | Discuss limitations of the study, taking into account sources of potential bias or imprecision. Discuss both direction and magnitude of any potential bias                                                   | 7                          |
| Interpretation           | 20  | Give a cautious overall interpretation of results considering objectives, limitations, multiplicity of analyses, results from similar studies, and other relevant evidence                                   | 6                          |
| Generalisability         | 21  | Discuss the generalisability (external validity) of the study results                                                                                                                                        | 6                          |
| <b>Other information</b> |     |                                                                                                                                                                                                              |                            |
| Funding                  | 22  | Give the source of funding and the role of the funders for the present study and, if applicable, for the original study on which the present article is based                                                | In manuscript details page |

\*Give information separately for cases and controls in case-control studies and, if applicable, for exposed and unexposed groups in cohort and cross-sectional studies.

**Note:** An Explanation and Elaboration article discusses each checklist item and gives methodological background and published examples of transparent reporting. The STROBE checklist is best used in conjunction with this article (freely available on the Web sites of PLoS Medicine at <http://www.plosmedicine.org/>, Annals of Internal Medicine at <http://www.annals.org/>, and Epidemiology at <http://www.epidem.com/>). Information on the STROBE Initiative is available at [www.strobe-statement.org](http://www.strobe-statement.org).

# BMJ Open

## The Case for Hospital Nurse-to-Patient Ratio Legislation in Queensland, Australia Hospitals: An Observational Study

|                                 |                                                                                                                                                                                                                                                                                                                                                                                                                                                                              |
|---------------------------------|------------------------------------------------------------------------------------------------------------------------------------------------------------------------------------------------------------------------------------------------------------------------------------------------------------------------------------------------------------------------------------------------------------------------------------------------------------------------------|
| Journal:                        | <i>BMJ Open</i>                                                                                                                                                                                                                                                                                                                                                                                                                                                              |
| Manuscript ID                   | bmjopen-2019-036264.R2                                                                                                                                                                                                                                                                                                                                                                                                                                                       |
| Article Type:                   | Original research                                                                                                                                                                                                                                                                                                                                                                                                                                                            |
| Date Submitted by the Author:   | 27-Jul-2020                                                                                                                                                                                                                                                                                                                                                                                                                                                                  |
| Complete List of Authors:       | McHugh, Matthew; University of Pennsylvania, School of Nursing, Center for Health Outcomes and Policy Research<br>Aiken, Linda; University of Pennsylvania, School of Nursing, Center for Health Outcomes and Policy Research<br>Windsor, Carol; Queensland University of Technology, School of Nursing<br>Douglas, Clint ; Queensland University of Technology Faculty of Health, School of Nursing<br>Yates, Patsy; Queensland University of Technology, School of Nursing |
| <b>Primary Subject Heading</b>: | Nursing                                                                                                                                                                                                                                                                                                                                                                                                                                                                      |
| Secondary Subject Heading:      | Health services research, Health policy                                                                                                                                                                                                                                                                                                                                                                                                                                      |
| Keywords:                       | Health policy < HEALTH SERVICES ADMINISTRATION & MANAGEMENT, Quality in health care < HEALTH SERVICES ADMINISTRATION & MANAGEMENT, International health services < HEALTH SERVICES ADMINISTRATION & MANAGEMENT                                                                                                                                                                                                                                                               |
|                                 |                                                                                                                                                                                                                                                                                                                                                                                                                                                                              |

SCHOLARONE™  
Manuscripts



I, the Submitting Author has the right to grant and does grant on behalf of all authors of the Work (as defined in the below author licence), an exclusive licence and/or a non-exclusive licence for contributions from authors who are: i) UK Crown employees; ii) where BMJ has agreed a CC-BY licence shall apply, and/or iii) in accordance with the terms applicable for US Federal Government officers or employees acting as part of their official duties; on a worldwide, perpetual, irrevocable, royalty-free basis to BMJ Publishing Group Ltd ("BMJ") its licensees and where the relevant Journal is co-owned by BMJ to the co-owners of the Journal, to publish the Work in this journal and any other BMJ products and to exploit all rights, as set out in our [licence](#).

The Submitting Author accepts and understands that any supply made under these terms is made by BMJ to the Submitting Author unless you are acting as an employee on behalf of your employer or a postgraduate student of an affiliated institution which is paying any applicable article publishing charge ("APC") for Open Access articles. Where the Submitting Author wishes to make the Work available on an Open Access basis (and intends to pay the relevant APC), the terms of reuse of such Open Access shall be governed by a Creative Commons licence – details of these licences and which [Creative Commons](#) licence will apply to this Work are set out in our licence referred to above.

Other than as permitted in any relevant BMJ Author's Self Archiving Policies, I confirm this Work has not been accepted for publication elsewhere, is not being considered for publication elsewhere and does not duplicate material already published. I confirm all authors consent to publication of this Work and authorise the granting of this licence.

1  
2  
3 **The Case for Hospital Nurse-to-Patient Ratio Legislation in Queensland, Australia**  
4 **Hospitals: An Observational Study**  
5

6 Matthew D. McHugh (Corresponding Author)  
7 Independence Chair for Nursing Education, Professor of Nursing  
8 University of Pennsylvania School of Nursing, Center for Health Outcomes and Policy  
9 Research  
10 418 Curie Blvd.  
11 Philadelphia, PA, USA 19104  
12 +1215-746-0205  
13 mchughm@nursing.upenn.edu  
14  
15

16 Linda H. Aiken  
17 The Claire M. Fagin Leadership Professor of Nursing  
18 Professor of Sociology  
19 University of Pennsylvania School of Nursing, Center for Health Outcomes and Policy  
20 Research  
21 Philadelphia, PA, USA  
22

23 Carol Windsor  
24 Associate Professor  
25 Queensland University of Technology School of Nursing  
26 Brisbane, QLD, Australia  
27

28 Clint Douglas  
29 Professor and Nursing Chair  
30 Queensland University of Technology School of Nursing  
31 Metro North Hospital and Health Service  
32 Brisbane, QLD, Australia  
33

34 Patsy Yates  
35 Distinguished Professor  
36 Queensland University of Technology School of Nursing  
37 Brisbane, QLD, Australia  
38  
39

40 Word count: 2975  
41  
42  
43  
44  
45  
46  
47  
48  
49  
50  
51  
52  
53  
54  
55  
56  
57  
58  
59  
60

## Abstract

**Objectives.** To determine whether there was variation in nurse staffing across hospitals in Queensland prior to implementation of nurse-to-patient ratio legislation targeting medical-surgical wards, and if so, the extent to which nurse staffing variation was associated with poor outcomes for patients and nurses.

**Design.** Analysis of cross-sectional data derived from nurse surveys linked with admitted patient outcomes data.

**Setting.** Public hospitals in Queensland.

**Participants.** 4,372 medical-surgical nurses and 146,456 patients in 68 public hospitals.

**Main Outcome Measures.** 30-day mortality, quality and safety indicators, nurse outcomes including emotional exhaustion and job dissatisfaction.

**Results.** Medical-surgical nurse-to-patient ratios before implementation of ratio legislation varied significantly across hospitals (mean 5.52 patients per nurse; SD = 2.03). After accounting for patient characteristics and hospital size, each additional patient per nurse was associated with 12% higher odds of 30-day mortality (OR=1.12; 95% CI 1.01–1.26). Each additional patient per nurse was associated with poorer outcomes for nurses including 15% higher odds of emotional exhaustion (OR = 1.15; 95% CI 1.07–1.23) and 14% higher odds of job dissatisfaction (OR = 1.14; 95% CI 1.02–1.28), as well as higher odds of concerns about quality of care (OR = 1.12; 95% CI 1.01–1.25) and patient safety (OR = 1.32; 95% CI 1.11–1.57).

**Conclusions.** Before ratios were implemented, nurse staffing varied considerably across Queensland hospital medical-surgical wards and higher nurse workloads were associated with patient mortality, low quality of care, nurse emotional exhaustion, and job dissatisfaction. The considerable variation across hospitals and the link with outcomes suggests that taking action to improve staffing levels was prudent.



## Article Summary

### Strengths and limitations of this study:

- Similar study design and measures to other published international studies examining the relationship between nurse staffing and outcomes.
- Study done just before implementation of ratios policy to quantify the scope of the variation in staffing and relationship with outcomes in the state.
- Measure of staffing derived directly from staff nurses.
- Indicators of quality, safety, job dissatisfaction, and emotional exhaustion from nurses as well as risk-adjusted patient outcome data on mortality.
- A limitation of cross-sectional data is that we cannot confirm that observed associations are causal, although studies using longitudinal data suggest that cross-sectional results closely approximate longitudinal panel results.

## The Case for Hospital Nurse-to-Patient Ratio Legislation in Queensland, Australia Hospitals: An Observational Study

Nurses provide round-the-clock care at the hospital bedside and act as a surveillance safety net for acutely ill patients. Having enough nurses with a manageable workload is important to ensure that nurses can effectively and consistently manage patient care needs, coordinate care, preempt clinical deterioration, prevent harm, and provide education for patients and families. There is strong evidence over decades internationally showing that patients cared for in hospitals with more patients per nurse have worse outcomes including mortality, adverse events, infections, and readmissions, compared with similar patients in hospitals with fewer patients per nurse.<sup>1-10</sup>

Responding to this growing evidence, the International Council of Nurses released a position statement on safe staffing in 2018, encouraging nursing organizations and governments to establish evidence-based staffing systems and policies.<sup>11</sup> A policy intervention often discussed, but rarely implemented is setting minimum nurse-to-patient ratios. Very few places around the world that have taken up such policies—California in the US, the state of Victoria in Australia, Wales, and Ireland are examples. As a result of this policy in California, the average medical or surgical unit nurse workload in California hospitals was one patient lower than in other states. Having fewer patients per nurse was associated with significantly lower patient mortality and nurse emotional exhaustion and job dissatisfaction, as well as better nurse-reported quality of care.<sup>4</sup> The state of Queensland, Australia, joined this short list when, on 1 July 2016, Queensland Health established minimum nurse-to-patient ratios for acute adult medical-surgical wards in 27 prescribed public hospitals across the state. The legislation requires that the average nurse-to-patient ratio on morning/afternoon shifts must be no less than 1:4 and on night shifts no less than 1:7.<sup>12</sup>

The purpose of this analysis was to determine the extent to which nurse-to-patient ratios varied across Queensland Health hospitals before the ratios legislation, and to evaluate the relationship between nurse-to-patient ratios and outcomes including patient mortality, quality and safety indicators, and nurse job outcomes including emotional exhaustion and job dissatisfaction. While minimum ratio policies have been implemented elsewhere, this is the first baseline evaluation of the need for such legislation. A common criticism of ratio policies is that there is not empirical evidence of a problem with staffing levels specific to the jurisdiction and intervention is not needed. The results will help determine if there was an empirical basis for the legislation, and will establish a baseline level of nurse staffing and patient outcomes against which to compare the impact of the legislation in the future.

### Methods

We conducted a cross-sectional analysis of data from surveys of Queensland hospital nurses and patient outcomes data. We linked individual surgical patient outcomes data with the aggregated nurse survey data describing medical-surgical nurse-to-patient ratios using a common hospital identifier. We described facility-level medical-surgical nurse staffing levels across hospitals and evaluated whether staffing levels were associated with outcomes. The approach is based on previous research using these same methods to study the relationship between nurse-to-patient ratios and outcomes in other countries.<sup>3,13</sup> The theoretical foundation for this organizational-level factors approach to studying outcomes is grounded in the Quality Health Outcomes Model, which suggests that the context in which care is delivered, including the staffing adequacy, affects quality of care and patient outcomes.<sup>14</sup> Ethics approval was obtained from the Queensland University of Technology and the University of Pennsylvania.

## Study Population and Data Sources

### *Nurse Survey*

We surveyed nurses to collect detailed information about their hospitals that is not available from any other source. We take advantage of nurses as informants of the organizational context in which care takes place because they are positioned at the bedside providing care, they are present 24 hours a day, and they communicate and work directly with doctors, other providers, patients and families, and hospital managers. This method of measuring organizational features of hospitals is more accurate than reports by a single “key informant” within a hospital and is supported by the organizational research literature.<sup>15</sup> We used the nurse survey data to create measures of acute adult medical-surgical nurse-to-patient ratios, quality of care and patient safety indicators, as well as individual nurse job outcomes (i.e., emotional exhaustion and job dissatisfaction).

The baseline nurse survey data were collected between May and June 2016 before implementation of ratios in July 2016. We used a modified Dillman<sup>16</sup> approach for email survey campaigns. We sent emails and reminders to 28,708 licensed nurses (all those with an available email address provided by the nurses’ union, which accounted for 90% of all hospital nurses) and received responses from 8,412 nurses, including 4,372 nurses who self-identified as working on a medical-surgical ward, giving an overall response rate of 29%. Our primary concern regarding representativeness, however, is at the hospital level; our sample of 68 public hospitals includes all Queensland public hospitals with  $\geq 50$  beds and over half with  $< 50$  beds. The average hospital was represented by 64 respondents; thus, the preponderance of Queensland public hospitals and all prescribed for ratios are represented. We provided respondents with a list of hospitals to identify their hospital, allowing us to aggregate responses and attribute medical-surgical nurse staffing information to their hospital and link with patient outcomes data.

### *Patient Data*

To examine the relationship between adult acute medical-surgical nurse staffing and patient outcomes, we used state-based clinical patient discharge data (the Queensland Hospital Admitted Patient Data) specific to general surgery, orthopedic, and vascular surgery patients. These conditions were selected because they account for a substantial share of hospital admissions (about one-third of all adult surgical and medical patients in Queensland), most hospitals care for these patients, and there are well established risk-adjustment methods.<sup>17,18</sup> This population is also consistent with other large studies evaluating the relationship between nurse staffing levels and patient outcomes internationally, which allows us to ascertain whether any evidence for this relationship in Queensland is similar or different from what has been observed outside of Australia.<sup>2,3,10</sup> The clinical information on patient outcomes was derived from the Queensland Hospital Admitted Patient Data, a database representing information on all inpatients in Queensland hospitals. These data were used to create the patient outcome indicator of 30-day mortality; these files also provide information on patient demographics, diagnoses and procedures (ICD10-AM coding), comorbidities, and discharge status. The files were linked with vital statistic death records allowing us to measure the outcome of 30-day mortality. There were no missing data in the population under investigation on variables of interest for this study.

### *Patient and public involvement*

This study utilized secondary patient data from a deidentified pre-existing data set—the Queensland Hospital Admitted Patient Data. The survey of nurses was based on an

1  
2  
3 established survey used in international research so that findings could be placed in the  
4 context of the broader international literature on the relationship between nurse staffing and  
5 outcomes. Thus, patients and nurses were not directly involved in the development of the  
6 research questions, variable measures, or study design.  
7

## 8 Measures

### 9 *Nurse-to-patient ratios*

10  
11 *Nurse-to-patient ratios.* Our primary measure of interest was the average nurse-to-  
12 patient ratios on non-ICU adult acute medical-surgical units (hereafter referred to as nurse-to-  
13 patient ratios). To be consistent with the legislation, “nurse” refers to both registered and  
14 enrolled nurses. By asking survey questions about how many nurses and how many patients  
15 were on the ward during the last shift, we obtain a nurse-to-patient ratio measure reflecting  
16 the average nurse-to-patient ratio for medical-surgical wards. This is consistent with the ratios  
17 legislation, which allows individual nurses to have a greater (or lesser) number of patients  
18 than the prescribed ratio so long as the ward average does not fall short during the shift. After  
19 aggregating these reports to the hospital level, this measure reflects the average nurse-to-  
20 patient ratio across all medical-surgical wards in the hospital and across shifts. This reflects  
21 the reality that over the course of a hospitalization, patients receive care from various nurses  
22 across multiple shifts and, often, in more than one hospital unit. Patient outcomes are  
23 determined, in part, by their exposure to staffing levels over the course of their  
24 hospitalization, which is captured by this aggregated measure. We express the ratio as the  
25 number of patients per nurse, which allows us to interpret our model results in terms of the  
26 effect of each additional patient per nurse on each outcome.  
27  
28  
29

### 30 *Outcomes*

31  
32 *Mortality.* We used the Queensland Hospital Admitted Patient Data to evaluate the  
33 outcome of 30-day mortality. In our mortality models, we included indicators from the  
34 Charlson comorbidity index to account for comorbidities.<sup>19-23</sup> We also included variables  
35 indicating sex and age along with dummy variables for 78 surgical procedure types.  
36  
37

38 *Quality of care and patient safety.* Our survey allowed us to collect information  
39 reflecting nurses’ assessments of a number of quality and safety indicators in their wards.  
40 Measures included the overall quality of care, the culture of safety, confidence that discharged  
41 patients are ready to care for themselves, confidence that management will resolve patient  
42 care concerns raised by nurses, and whether nurses would recommend the hospital to family  
43 and friends in need of care.<sup>24</sup> Evidence shows that nurse-reported quality indicators  
44 correspond closely with objective patient outcomes measures like mortality.<sup>25,26</sup>  
45

46 *Nurse outcomes.* As in prior work,<sup>2,13,27</sup> emotional exhaustion, a key feature of  
47 burnout, was measured using the Emotional Exhaustion subscale of the Maslach Burnout  
48 Inventory.<sup>28-29</sup> Nurses were classified as being “emotionally exhausted” if their score was  
49 higher than the published average for health care workers ( $\geq 27$ ). Job dissatisfaction was  
50 measured using nurses’ responses to the question, “How satisfied are you with your current  
51 job?” The four-point Likert-type scale response options range from very satisfied to very  
52 dissatisfied. We dichotomized the measure such that nurses who reported being either very  
53 dissatisfied or a little dissatisfied were described as “dissatisfied” and nurses reporting being  
54 moderately satisfied or very satisfied were described as “satisfied.”<sup>27</sup>  
55  
56

## 57 Statistical Analysis

We first described nurse-to-patient ratios across Queensland Health hospitals. We then examined the relationship between nurse-to-patient ratios and patient mortality among general, orthopedic, or vascular surgery patients. We employed a series of robust multi-level logistic regression models, accounting for clustering of patients within hospitals. We began with the unadjusted bivariate relationship between nurse staffing and mortality. Then we estimated adjusted models that included covariates to account for the various patient characteristics (e.g., age, sex, comorbidities, surgical procedure) and hospital size. To evaluate the relationship between nurse-to-patient ratios and nurse job outcomes and the nurse-reported quality and safety indicators, we used robust logistic regression models, which take account of the clustering of nurses within hospitals, to estimate the odds of nurses reporting each outcome relative to an additional patient per nurse. We estimated these models before and after adjusting for hospital size and for nurse characteristics including age, sex, and years of experience.

## Results

**Table 1** shows the characteristics of the 68 public Queensland Health hospitals with both patient data and nurse-to-patient ratio data. The average medical-surgical staffing ratios across all shifts was 5.52 patients per nurse (SD=2.03). For morning and afternoon shifts, the average was 5.07 (SD=1.85) patients per nurse, while for night shifts the average was 7.4 (SD=2.3) patients per nurse.

**Table 2** shows the characteristics of our surgical patient population. Our analysis included 146,456 general, orthopedic, and vascular surgery patients. The average mortality rate was relatively low overall (1.13%) and is consistent with findings in Europe and the US.<sup>2,5</sup> **Table 3** shows that the variation in nurse-to-patient ratios on medical-surgical wards had consequences for patients. After accounting for patient characteristics and hospital size, each additional patient per medical-surgical nurse was associated with 12% higher odds of death (OR=1.12; 95% CI 1.01–1.26). These results are multiplicative such that an additional two patients per nurse would be associated with 25% higher odds of death (OR = 1.12<sup>2</sup> or 1.25).

**Figure 1** shows how the percentage of nurses reporting quality, safety, and job outcomes varied in hospitals with different morning/afternoon staffing levels in terms of patients per nurse ( $\leq 4$ ;  $4 \leq 5$ ;  $5 \leq 6$ ;  $> 6$ ). In all cases, a smaller proportion of nurses reported negative outcomes in hospitals with an average of  $\leq 4$  patients per nurse. For example, only about 5% of nurses in hospitals with  $\leq 4$  patients per nurse reported that quality of care is only fair or poor on their unit, while 15% of nurses in hospitals with an average of  $5 \leq 6$  patients per nurse rated their hospital poorly. Twenty four percent of nurses in hospitals with the best staffing levels met the criteria for emotional exhaustion, while 43% of nurses in hospitals with  $> 6$  patients per nurse were emotionally exhausted.

**Table 4** shows that in all but one instance (*confidence patients can manage care after discharge*), higher workloads (i.e., worse nurse-to-patient ratios) were consistently associated with worse quality and safety. After accounting for individual nurse characteristics and hospital size, each additional patient per nurse was associated with 30% higher odds of a nurse not recommending the hospital to family or friends (OR = 1.30; 95% CI 1.14–1.49), 32% higher odds of rating patient safety at their hospital as less than excellent (OR = 1.32; 95% CI 1.11–1.57), and 12% higher odds of rating quality as less than excellent (OR = 1.12; 95% CI 1.01–1.25). Each additional patient per nurse was associated with 15% higher odds of emotional exhaustion (OR = 1.15; 95% CI 1.07–1.23) and 14% higher odds of job dissatisfaction (OR = 1.14; 95% CI 1.02–1.28). These coefficients are also multiplicative; for



1  
2  
3 example, an additional two patients per nurse would be associated with 69% higher odds of  
4 not recommending the hospital to family or friends (OR = 1.30<sup>2</sup> or 1.69).

## 6 Discussion

7  
8 Nurse-to-patient ratios varied considerably across Queensland Health hospitals and  
9 worse nurse-to-patient ratios were linked with patient mortality, worse quality of care and  
10 patient safety, and nurse emotional exhaustion and job dissatisfaction. The finding that each  
11 additional patient per nurse was associated with increased odds of mortality is consistent with  
12 results from studies in the United States and Europe based on a similar protocol.<sup>2,3</sup>  
13 Queensland is one of the few places worldwide to implement minimum nurse-to-patient  
14 ratios. While some evaluation of these policies have taken place in these other locations, this  
15 is the first baseline study of staffing ratios prior to policy implementation.

16  
17  
18 Nurse-to-patient ratios are not just important for patients; poor ratios can negatively  
19 affect nurses in terms of emotional exhaustion and job dissatisfaction, which are associated  
20 with costly turnover.<sup>30-31</sup> The National Academy of Medicine's newest landmark report,  
21 *Taking Action Against Clinician Burnout: A Systems Approach to Professional Well-Being*,<sup>32</sup>  
22 highlights the central role that system factors like inadequate staffing play in the growing  
23 burnout and emotional exhaustion levels among clinicians. Our findings in Queensland are  
24 consistent with those reported in the US and Europe regarding the link between staffing and  
25 job dissatisfaction, emotional exhaustion, and concerns about quality and safety.<sup>2,13,24</sup> Studies  
26 have shown that hospitals that improved in terms of nurse staffing significantly lowered rates  
27 of emotional exhaustion among their nurses.<sup>33</sup> These outcomes are also important indicators  
28 of hospital performance because of their relationship to patient outcomes; for example,  
29 research has shown that hospitals with many dissatisfied nurses also had higher proportions of  
30 dissatisfied patients.<sup>27,34</sup>

31  
32  
33 Nurse staffing is necessary but not sufficient to ensure good outcomes. Research  
34 suggests that hospitals with good work environments—where nurses have autonomy,  
35 opportunities for advancement, support and trust of management, excellent relationships built  
36 on professional respect with physician colleagues, and active engagement in organizational  
37 decision-making—have better outcomes for nurses and patients.<sup>24,33,35,36,37</sup> The benefits of  
38 better nurse staffing are conditional on having a good work environment; thus, investing in  
39 more staff without considering the environment in which those staff work may fall short of  
40 expected improvements.<sup>37</sup> Creating good work environments are directly within the control of  
41 management, and although they have much less associated cost than investments in more  
42 staff, they require purposeful effort. One example of an intervention aimed at improving the  
43 work environment along these domains is the Magnet hospital recognition program. Studies  
44 show that outcomes for nurses and patients are better in Magnet hospitals, and hospitals that  
45 have pursued Magnet recognition have seen improvements beyond those seen in hospitals that  
46 have not gone through this transformation.<sup>38,39</sup> There is only one Magnet hospital in  
47 Queensland.

48  
49  
50  
51 A potential limitation of our study is that our data are cross-sectional. This is often  
52 suggested to imply a reduced ability to establish a conclusive causal relationship between  
53 nurse staffing levels and nurse and patient outcomes. However, we note that studies that have  
54 simultaneously considered longitudinal associations with cross-sectional associations suggest  
55 that the cross-sectional findings are reasonably close to what would be observed if we were  
56 able to examine how changes in staffing over time align with changes in outcomes.<sup>24</sup> Future  
57 research should directly employ a longitudinal design to confirm whether our cross-sectional  
58 findings are truly causative. Similarly, research determining the mechanisms through which  
59  
60

1  
2  
3 better staffing has its impact on outcomes would be beneficial. There are some indications  
4 that by having more time to allocate to each patient when workloads are more manageable,  
5 nurses are able to provide needed care including surveillance for complications, direct  
6 engagement talking with patients and family, and necessary treatments, that they would like  
7 to provide but must forego or limit due to time and resource constraints.<sup>40</sup> Additionally,  
8 because many of our outcomes (apart from mortality) are nurse reported, further research  
9 using more outcomes from other sources would increase the robustness of the findings. We  
10 focus on nurses in medical surgical wards, aggregating to the hospital level, and cannot  
11 separate specific units within that unit type, although significant variation in staffing is  
12 limited across units of the same type within the same hospital.  
13  
14

### 15 **Conclusion.**

16  
17 The International Council of Nurses' 2018 position statement on safe staffing<sup>11</sup> highlighted  
18 the large body of international literature suggesting a consistent relationship between nurse  
19 staffing and good outcomes. Our findings in Queensland are consistent with this evidence-  
20 base and suggest that taking action to improve staffing was a reasonable policy approach that  
21 could lead to improved patient safety and quality.  
22  
23  
24  
25  
26  
27  
28  
29  
30  
31  
32  
33  
34  
35  
36  
37  
38  
39  
40  
41  
42  
43  
44  
45  
46  
47  
48  
49  
50  
51  
52  
53  
54  
55  
56  
57  
58  
59  
60

**Table 1** Hospital characteristics (N=68)

|                                                           | N    | %      |
|-----------------------------------------------------------|------|--------|
| <b>Beds</b>                                               |      |        |
| <50                                                       | 39   | 57%    |
| 50-99                                                     | 8    | 12%    |
| 100-199                                                   | 5    | 7%     |
| 200-500                                                   | 11   | 16%    |
| >500                                                      | 5    | 7%     |
| <b>Medical-surgical patients per nurse</b>                |      |        |
| 4 or fewer patients per nurse                             | 13   | 19%    |
| 4<=5 patients per nurse                                   | 26   | 38%    |
| 5<=6 patients per nurse                                   | 17   | 25%    |
| >6 patients per nurse                                     | 12   | 18%    |
| <b>Mean medical-surgical patients per nurse, by shift</b> |      |        |
|                                                           | Mean | (SD)   |
| All shifts                                                | 5.52 | (2.03) |
| Morning/afternoon shifts                                  | 5.07 | (1.85) |
| Night shifts                                              | 7.38 | (2.30) |



**Table 2** Characteristics of surgical patients (N=146,456)

| Characteristic         | n      | %      |
|------------------------|--------|--------|
| Age (years), mean (SD) | 62.8   | (17.9) |
| Male                   | 71,616 | 48.9%  |
| Surgical category      |        |        |
| General surgery        | 44,229 | 30.2%  |
| Orthopedic surgery     | 49,062 | 33.5%  |
| Vascular surgery       | 52,165 | 36.3%  |
| 30-day mortality       | 1,654  | 1.13%  |

**Table 3** Unadjusted and adjusted odds-ratios (OR) for relationship between number of medical-surgical patients per nurse and 30-day mortality (N=146,456)

|                  | Unadjusted |       |               | Adjusted |       |               |
|------------------|------------|-------|---------------|----------|-------|---------------|
|                  | OR         | P     | (95% C.I.)    | OR       | P     | (95% C.I.)    |
| 30-day mortality | 0.90       | 0.186 | (0.78 – 1.05) | 1.12     | 0.048 | (1.01 – 1.26) |

Notes: Logistic regression models adjusting for patient characteristics including age, sex, 17 comorbidities [myocardial infarction, congestive heart failure; peripheral vascular; cerebrovascular disease; dementia; chronic obstructive pulmonary; rheumatoid disease; peptic ulcer; mild liver disease; diabetes; diabetes with complications; hemiplegia or paraplegia; renal disease; cancer; moderate/severe liver disease; metastatic cancer; AIDS], 78 specific surgical procedures, as well as hospital size.

**Table 4** Unadjusted and adjusted odds-ratios (OR) indicating the relationship between nurse staffing and quality of care and safety indicators (N=4,372)

|                                                             | Unadjusted |          |             | Adjusted |          |             |
|-------------------------------------------------------------|------------|----------|-------------|----------|----------|-------------|
|                                                             | OR         | <i>p</i> | (95% C.I.)  | OR       | <i>p</i> | (95% C.I.)  |
| <b>Quality and Safety Outcomes</b>                          |            |          |             |          |          |             |
| Quality less than excellent                                 | 1.12       | 0.049    | (1.00–1.25) | 1.12     | 0.037    | (1.01–1.25) |
| Quality fair or poor                                        | 1.18       | 0.004    | (1.05–1.31) | 1.17     | 0.003    | (1.05–1.31) |
| Rate patient safety as less than excellent                  | 1.33       | 0.002    | (0.99–1.52) | 1.32     | 0.002    | (1.11–1.57) |
| Not confident patients can manage care after discharge      | 1.09       | 0.091    | (0.99–1.21) | 1.06     | 0.247    | (0.96–1.16) |
| Not confident management will resolve patient care problems | 1.18       | 0.034    | (1.01–1.37) | 1.16     | 0.041    | (1.01–1.35) |
| Would not recommend hospital to family or friends           | 1.29       | <0.000   | (1.12–1.49) | 1.30     | <0.000   | (1.14–1.49) |
| <b>Job Outcomes</b>                                         |            |          |             |          |          |             |
| Dissatisfied with job                                       | 1.17       | 0.006    | (1.05–1.31) | 1.14     | 0.018    | (1.02–1.28) |
| Dissatisfied with workload                                  | 1.37       | <0.000   | (1.22–1.53) | 1.36     | <0.000   | (1.20–1.53) |
| Emotional exhaustion                                        | 1.14       | <0.000   | (1.07–1.23) | 1.15     | <0.000   | (1.07–1.23) |

Notes: Logistic regression models adjusting for nurse characteristics (age, sex, years of experience) as well as hospital size.

### Contributorship statement

All authors meet the criteria recommended by the International Committee of Medical Journal Editors (ICMJE). MDM, LHA, CW, CD, and PY contributed to the original idea and design of the study. MDM, LHA, CW, CD, and PY contributed to the collection of data. MDM conducted the data analysis. All authors contributed to the interpretation of the data and preparation of the submitted manuscript. All authors approved the submitted manuscript.

### Competing interests

None declared

### Funding

This investigation was supported by Queensland Health (project NM006239/RP731123) and the National Institute of Nursing Research (NINR; R01NR014855). The funders had no role in the study design, data collection and analysis, decision to publish or preparation of the manuscript. The researchers are solely responsible for the findings and their interpretation and do not necessarily represent the views or conclusions of Queensland Health or NINR.

### Acknowledgement

We would like to acknowledge Tim Cheney, Andrew Dierkes, Frances Hughes, Irene Hung, Beth Mohle, Shelley Nowlan, Douglas Sloane, and Natalie Spearing for their contributions to this work.

### Data sharing statement

The nurse survey data are not available. The patient data are from the Queensland Admitted Patient Data Collection and approval for their use can be requested directly from Queensland Health.

### Figure legend

Figure 1. Percentage of nurses reporting quality, safety, and job outcomes across facilities with varying nurse-to-patient ratios.

## References

1. Haegdorens F, Van Bogaert P, De Meester K, Monsieurs KG. The impact of nurse staffing levels and nurse's education on patient mortality in medical and surgical wards: an observational multicentre study. *BMC Health Serv Res* 2019;19:1-9.
2. Aiken LH, Clarke SP, Sloane DM, Sochalski J, Silber JH. Hospital nurse staffing and patient mortality, nurse burnout, and job dissatisfaction. *JAMA* 2002;288:1987-1993.
3. Aiken LH, Sloane DM, Bruyneel L, et al. Nurse staffing and education and hospital mortality in nine European countries: a retrospective observational study. *The Lancet* 2014;383:1824-1830.
4. Aiken LH, Sloane DM, Cimiotti JP, et al. Implications of the California nurse staffing mandate for other states. *Health Serv Res* 2010;45:904-921.
5. Duffield C, Diers D, O'Brien-Pallas L, et al. Nursing staffing, nursing workload, the work environment and patient outcomes. *Appl Nurs Res* 2010;24:244-255.
6. Lasater KB, McHugh MD. Nurse staffing and the work environment linked to readmissions among older adults following elective total hip and knee replacement. *Int J Quality Health Care* 2016;28:253-258.
7. Griffiths P, Maruotti A, Saucedo AR, et al. Nurse staffing, nursing assistants and hospital mortality: retrospective longitudinal cohort study. *BMJ Qual Saf* 2019;28:609-617.
8. Carthon JMB, Davis L, Dierkes A, et al. Association of nurse engagement and nurse staffing on patient safety. *J Nurs Care Qual* 2019;34:40-46.
9. Needleman J, Buerhaus P, Pankratz VS, Leibson CL, Stevens SR, Harris M. Nurse staffing and inpatient hospital mortality. *N Engl J Med* 2011;364:1037-1045.
10. Silber JH, Rosenbaum, PR, McHugh MD, et al. Comparison of the value of nursing work environments in hospitals across different levels of patient risk. *JAMA Surg* 2016;151:527-536.
11. International Council of Nurses (2018) Evidence-based safe nurse staffing: position statement. [cited 2020 May 21]. Available from: <https://www.icn.ch/nursing-policy/position-statements>
12. Palaszczuk A, Dick C. Nurse to patient ratio legislation introduced. Media statement. 2015 Dec 01. Available from: <http://statements.qld.gov.au/Statement/2015/12/1/nurse-to-patient-ratio-legislation-introducedaw>
13. Aiken LH, Sermeus W, Vanden Heede K, et al. Patient safety, satisfaction, and quality of hospital care: cross-sectional surveys of nurses and patients in 12 countries in Europe and the United States. *BMJ*. 2012;344:e1717.
14. Mitchell PH, Ferketich S, Jennings BM, American Academy of Nursing Expert Panel on Quality Health Care. Quality health outcomes model. *Image J Nurs Sch* 1998;30:43-46.
15. Aiken M, Hage J. Organizational interdependence and intra-organizational structure. *Am Sociol Rev* 1968;33:912-930.
16. Dillman DA, Smyth JD, Christian LM. Internet, Phone, Mail, and Mixed-Mode Surveys: The Tailored Design Method. Hoboken, New Jersey: John Wiley & Sons; 2014.

17. Patel MS, Volpp KG, Small DS, et al. Association of the 2011 ACGME resident duty hour reforms with mortality and readmissions among hospitalized Medicare patients. *JAMA* 2014;312:2364-2373.
18. Volpp KG, Rosen AK, Rosenbaum PR, et al. Mortality among hospitalized Medicare beneficiaries in the first 2 years following ACGME resident duty hour reform. *JAMA* 2007;298:975-983.
19. Charlson M, Szatrowski TP, Peterson J, Gold J. Validation of a combined comorbidity index. *J Clin Epidemiol* 1994;47:1245-1251.
20. Li B, Evans D, Faris P, Dean S, Quan H. Risk adjustment performance of Charlson and Elixhauser comorbidities in ICD-9 and ICD-10 administrative databases. *BMC Health Serv Res* 2008;8:12-19.
21. Quan H, Li B, Couris CM, et al. Updating and validating the Charlson comorbidity index and score for risk adjustment in hospital discharge abstracts using data from 6 countries. *Am J Epidemiol* 2011;173:676-682.
22. Quan H, Sundararajan V, Halfon P, et al. Coding algorithms for defining comorbidities in ICD-9-CM and ICD-10 administrative data. *Med Care* 2005;43:1130-1139.
23. Sundararajan V, Henderson T, Perry C, Muggivan A, Quan H, Ghali WA. New ICD-10 version of the Charlson comorbidity index predicted in-hospital mortality. *J Clin Epidemiol* 2004;57:1288-1294.
24. Sloane DM, Smith HL, McHugh MD, Aiken LH. Effect of changes in hospital nursing resources on improvements in patient safety and quality of care: A panel study. *Med Care* 2018;56:1001-1008.
25. McHugh MD, Stimpfel AW. Nurse reported quality of care: A measure of hospital quality. *Res Nurs Health* 2012;35:566-575.
26. Smeds Alenius L, Tishelman C, Lindqvist R, Runesdotter S, McHugh MD. RN assessments of excellent quality of care and patient safety are associated with significantly lower odds of 30-day inpatient mortality: a national cross-sectional study of acute-care hospitals. *Int J Nurs Stud* 2016;61:117-124.
27. McHugh MD, Kutney-Lee A, Cimiotti JP, Sloane DM, Aiken LH. Nurses' widespread job dissatisfaction, burnout and frustration with health benefits signal problems for patient care. *Health Aff* 2011;30:202-210.
28. Maslach C, & Jackson, S.E. Maslach Burnout Inventory Manual. 2nd ed. Palo Alto, CA: Consulting Psychologists Press.; 1986.
29. Maslach C, Jackson SE. Burnout in health professions: a social psychologists analysis. In: Saunders G, Suls J, eds. Social Psychology of Health and Illness. Hillsdale, NJ: Lawrence Erlbaum Association; 1982:227-251.
30. Gilmartin MJ. Thirty years of nursing turnover research: looking back to move forward. *Med Care Res Rev* 2013;70:3-28.
31. Hayes LJ, O'Brien-Pallas L, Duffield C, et al. Nurse turnover: a literature review - an update. *Int J Nurs Stud* 2012;49:887-905.

- 1  
2  
3 32. National Academies of Sciences Engineering and Medicine. Taking Action Against Clinician  
4 Burnout: A Systems Approach to Professional Well-Being. Washington, DC: The National  
5 Academies Press;2019.  
6  
7 33. Kutney-Lee A, Wu ES, Sloane DM, Aiken LH. Changes in hospital nurse work environments and  
8 nurse job outcomes: An analysis of panel data. *Int J Nurs Stud* 2013;50:195-201.  
9  
10 34. Vahey DC, Aiken LH, Sloane DM, Clarke SP, Vargas D. Nurse burnout and patient satisfaction.  
11 *Med Care* 2004;42:II57-66.  
12  
13 35. Aiken LH, Sloane DM, Barnes H, Cimiotti J, Jarrin O, McHugh MD. Nurses' and patients'  
14 appraisals show patient safety in hospitals is still deficient and recommended measures not  
15 implemented. *Health Aff* 2018;37:1744-1751.  
16  
17 36. McHugh MD, Aiken LH, Eckenhoff M, Burns LR. Achieving Kaiser Permanente quality. *Health*  
18 *Care Manage Rev* 2016;41:178-188.  
19  
20 37. Aiken LH, Cimiotti JP, Sloane DM, Smith HL, Flynn L, Neff DF. Effects of nurse staffing and  
21 nurse education on patient deaths in hospitals with different nurse work environments. *Med Care*  
22 2011;49(10):1047-1053.  
23  
24 38. Kutney-Lee A, Quinn L, Witkoski Stimpfel A, Sloane DM, Cimiotti J, Aiken LH. Changes in  
25 patient and nurse outcomes associated with Magnet hospital recognition. *Med Care* 2015;53:550-  
26 557.  
27  
28 39. McHugh MD, Kelly LA, Smith HL, Wu ES, Vanak J, Aiken LH. Lower mortality in Magnet  
29 hospitals. *Med Care* 2013;51:382-388.  
30  
31 40. Ball, J. E., Bruyneel, L., Aiken, L. H., Sermeus, W., Sloane, D. M., Rafferty, A. M., . . .  
32 RN4CAST Consortium. Post-operative mortality, missed care and nurse staffing in nine  
33 countries: A cross-sectional study. *Int J Nurs Stud* 2018; 78: 10-15.  
34  
35  
36  
37  
38  
39  
40  
41  
42  
43  
44  
45  
46  
47  
48  
49  
50  
51  
52  
53  
54  
55  
56  
57  
58  
59  
60

1  
2  
3  
4  
5  
6  
7  
8  
9  
10  
11  
12  
13  
14  
15  
16  
17  
18  
19  
20  
21  
22  
23  
24  
25  
26  
27  
28  
29  
30  
31  
32  
33  
34  
35  
36  
37  
38  
39  
40  
41  
42  
43  
44  
45  
46  
47  
48  
49  
50  
51  
52  
53  
54  
55  
56  
57  
58  
59  
60

Figure 1. Percentage of nurses reporting quality, safety, and job outcomes across hospitals with varying average number of patients per nurse



93x71mm (600 x 600 DPI)



**STROBE 2007 (v4) Statement—Checklist of items that should be included in reports of *cross-sectional studies***

| Section/Topic                | Item # | Recommendation                                                                                                                                                                       | Reported on page # |
|------------------------------|--------|--------------------------------------------------------------------------------------------------------------------------------------------------------------------------------------|--------------------|
| <b>Title and abstract</b>    | 1      | (a) Indicate the study's design with a commonly used term in the title or the abstract                                                                                               | 3                  |
|                              |        | (b) Provide in the abstract an informative and balanced summary of what was done and what was found                                                                                  | 1                  |
| <b>Introduction</b>          |        |                                                                                                                                                                                      |                    |
| Background/rationale         | 2      | Explain the scientific background and rationale for the investigation being reported                                                                                                 | 3                  |
| Objectives                   | 3      | State specific objectives, including any prespecified hypotheses                                                                                                                     | 3                  |
| <b>Methods</b>               |        |                                                                                                                                                                                      |                    |
| Study design                 | 4      | Present key elements of study design early in the paper                                                                                                                              | 3                  |
| Setting                      | 5      | Describe the setting, locations, and relevant dates, including periods of recruitment, exposure, follow-up, and data collection                                                      | 4                  |
| Participants                 | 6      | (a) Give the eligibility criteria, and the sources and methods of selection of participants                                                                                          | 4                  |
| Variables                    | 7      | Clearly define all outcomes, exposures, predictors, potential confounders, and effect modifiers. Give diagnostic criteria, if applicable                                             | 4-5                |
| Data sources/<br>measurement | 8*     | For each variable of interest, give sources of data and details of methods of assessment (measurement). Describe comparability of assessment methods if there is more than one group | 4-5                |
| Bias                         | 9      | Describe any efforts to address potential sources of bias                                                                                                                            | 5                  |
| Study size                   | 10     | Explain how the study size was arrived at                                                                                                                                            | 4-5                |
| Quantitative variables       | 11     | Explain how quantitative variables were handled in the analyses. If applicable, describe which groupings were chosen and why                                                         | 4,                 |
| Statistical methods          | 12     | (a) Describe all statistical methods, including those used to control for confounding                                                                                                | 5                  |
|                              |        | (b) Describe any methods used to examine subgroups and interactions                                                                                                                  | n/a                |
|                              |        | (c) Explain how missing data were addressed                                                                                                                                          | 4                  |
|                              |        | (d) If applicable, describe analytical methods taking account of sampling strategy                                                                                                   | n/a                |
|                              |        | (e) Describe any sensitivity analyses                                                                                                                                                | n/a                |
| <b>Results</b>               |        |                                                                                                                                                                                      |                    |

|                          |     |                                                                                                                                                                                                              |                            |
|--------------------------|-----|--------------------------------------------------------------------------------------------------------------------------------------------------------------------------------------------------------------|----------------------------|
| Participants             | 13* | (a) Report numbers of individuals at each stage of study—eg numbers potentially eligible, examined for eligibility, confirmed eligible, included in the study, completing follow-up, and analysed            | 4                          |
|                          |     | (b) Give reasons for non-participation at each stage                                                                                                                                                         | 4                          |
|                          |     | (c) Consider use of a flow diagram                                                                                                                                                                           | n/a                        |
| Descriptive data         | 14* | (a) Give characteristics of study participants (eg demographic, clinical, social) and information on exposures and potential confounders                                                                     | 5                          |
|                          |     | (b) Indicate number of participants with missing data for each variable of interest                                                                                                                          | n/a                        |
| Outcome data             | 15* | Report numbers of outcome events or summary measures                                                                                                                                                         | 5, 6                       |
| Main results             | 16  | (a) Give unadjusted estimates and, if applicable, confounder-adjusted estimates and their precision (eg, 95% confidence interval). Make clear which confounders were adjusted for and why they were included | 5, 6                       |
|                          |     | (b) Report category boundaries when continuous variables were categorized                                                                                                                                    | 5-6                        |
|                          |     | (c) If relevant, consider translating estimates of relative risk into absolute risk for a meaningful time period                                                                                             | n/a                        |
| Other analyses           | 17  | Report other analyses done—eg analyses of subgroups and interactions, and sensitivity analyses                                                                                                               | n/a                        |
| <b>Discussion</b>        |     |                                                                                                                                                                                                              |                            |
| Key results              | 18  | Summarise key results with reference to study objectives                                                                                                                                                     | 6                          |
| Limitations              | 19  | Discuss limitations of the study, taking into account sources of potential bias or imprecision. Discuss both direction and magnitude of any potential bias                                                   | 7                          |
| Interpretation           | 20  | Give a cautious overall interpretation of results considering objectives, limitations, multiplicity of analyses, results from similar studies, and other relevant evidence                                   | 6                          |
| Generalisability         | 21  | Discuss the generalisability (external validity) of the study results                                                                                                                                        | 6                          |
| <b>Other information</b> |     |                                                                                                                                                                                                              |                            |
| Funding                  | 22  | Give the source of funding and the role of the funders for the present study and, if applicable, for the original study on which the present article is based                                                | In manuscript details page |

\*Give information separately for cases and controls in case-control studies and, if applicable, for exposed and unexposed groups in cohort and cross-sectional studies.

**Note:** An Explanation and Elaboration article discusses each checklist item and gives methodological background and published examples of transparent reporting. The STROBE checklist is best used in conjunction with this article (freely available on the Web sites of PLoS Medicine at <http://www.plosmedicine.org/>, Annals of Internal Medicine at <http://www.annals.org/>, and Epidemiology at <http://www.epidem.com/>). Information on the STROBE Initiative is available at [www.strobe-statement.org](http://www.strobe-statement.org).
